# Supplementary material for: Metal–organic frameworks incorporating azobenzene-based ligands as a heterogeneous Lewis-acid catalyst for cyanosilylation of imines
Source: Royal Society of Chemistry journal article supplement (doi:10.1039/d2ra06858c), 2022-01-01
Supplement: d2ra06858c1.pdf [file d2ra06858c1.pdf]

## Electronic supplementary information (ESI)

# Metal-Organic Frameworks Incorporating Azobenzene-based Ligands as Heterogenous Lewis-Acid Catalyst for Cyanosilylation of Imines †

Aasim Saeed,<sup>a</sup> Xiao-Yu Zhang,<sup>a</sup> Zi-Qing Huang,<sup>a</sup> Xin-Yang Zhao,<sup>a</sup> Lei Xu,<sup>b</sup> Yue Zhao,<sup>\*a</sup> Wei-Yin Sun<sup>\*a</sup> and Jing Zhao<sup>\*a</sup>

<sup>a</sup> *Coordination Chemistry Institute, State Key Laboratory of Coordination Chemistry, School of Chemistry and Chemical Engineering, Nanjing University, Nanjing 210023, China.*

<sup>b</sup> *Jiangsu Key Lab of Data Engineering and Knowledge Service, School of Information Management, Nanjing University, Nanjing 210023, China.*

*Email address:* zhaoyue@nju.edu.cn (Y. Zhao), jingzhao@nju.edu.cn (J. Zhao), sunwy@nju.edu.cn (W. Y. Sun)

**Table S1.** Selected bond lengths (Å) and angles (°) for **1** and **2**.

| <b>1</b>      |            |             |            |
|---------------|------------|-------------|------------|
| Zn1-O1        | 1.9309(18) | Zn1-O3#1    | 1.9410(17) |
| Zn1-O5        | 2.049(2)   | Zn1-N2      | 2.024(2)   |
| O1-Zn1-O3#1   | 120.66(8)  | O1-Zn1-O5   | 103.98(8)  |
| O3#1-Zn1-O5   | 101.82(8)  | O1-Zn1-N2   | 128.77(9)  |
| O3#1-Zn1-N2   | 101.31(8)  | N2-Zn1-O5   | 93.75(8)   |
| <b>2</b>      |            |             |            |
| Cd1-O1        | 2.288(2)   | Cd1-O2      | 2.596(2)   |
| Cd1-O3        | 2.269(2)   | Cd1-O4#1    | 2.387(2)   |
| Cd1-O5        | 2.272(2)   | Cd1-N1      | 2.303(2)   |
| O1-Cd1-O2     | 85.78(9)   | O1-Cd1-O4#1 | 171.54(8)  |
| O3-Cd1-O1     | 97.86(9)   | O3-Cd1-O2   | 53.04(7)   |
| O3-Cd1-O4#1   | 90.50(8)   | O3-Cd1-O5#2 | 88.88(8)   |
| O4#1-Cd1-O2   | 100.34(7)  | O5#2-Cd1-N1 | 132.04(8)  |
| O5#2-Cd1-O1   | 82.80(9)   | O5#2-Cd1-O2 | 138.13(7)  |
| O5#2-Cd1-O4#1 | 96.20(8)   | O1-Cd1-N1   | 84.98(9)   |
| O3-Cd1-N1     | 138.80(9)  | N1-Cd1-O2   | 86.49(8)   |
| N1-Cd1-O4#1   | 89.55(7)   |             |            |

Symmetry codes: #1 x-1, y-1, z; for **1**. #1 -x, -y+1, -z+1; #2 x+1, y+1, z for **2**.

**Table S2.** Hydrogen bonding data of **1** and **2**.

| <b>1</b>        |                     |              |                       |                     |
|-----------------|---------------------|--------------|-----------------------|---------------------|
| <i>D</i> -H···A | d( <i>D</i> -H) (Å) | d(H···A) (Å) | d( <i>D</i> ···A) (Å) | <i>D</i> -H···A (°) |
| O5-H5A···O2     | 0.84                | 1.87         | 2.704(3)              | 173                 |
| O5-H5B···O6     | 0.70                | 1.95         | 2.653(3)              | 178                 |
| O6-H6A···O7     | 0.87                | 2.22         | 2.830(5)              | 127                 |
| O6-H6B···O7     | 0.87                | 1.95         | 2.767(4)              | 156                 |
| O7-H7A···O(4)   | 0.87                | 1.86         | 2.701(3)              | 164                 |
| O7-H7B···N(3)   | 0.87                | 2.19         | 3.022(4)              | 161                 |

  

| <b>2</b>        |                     |              |                       |                     |
|-----------------|---------------------|--------------|-----------------------|---------------------|
| <i>D</i> -H···A | d( <i>D</i> -H) (Å) | d(H···A) (Å) | d( <i>D</i> ···A) (Å) | <i>D</i> -H···A (°) |
| O1-H1A···O2     | 1.04                | 1.72         | 2.742(3)              | 170                 |
| C9-H9···O2      | 0.95                | 2.43         | 3.181(3)              | 136                 |
| C9-H9···O1      | 0.95                | 2.59         | 3.462(4)              | 152                 |
| C13-H13···O4    | 0.95                | 2.44         | 3.198(4)              | 136                 |

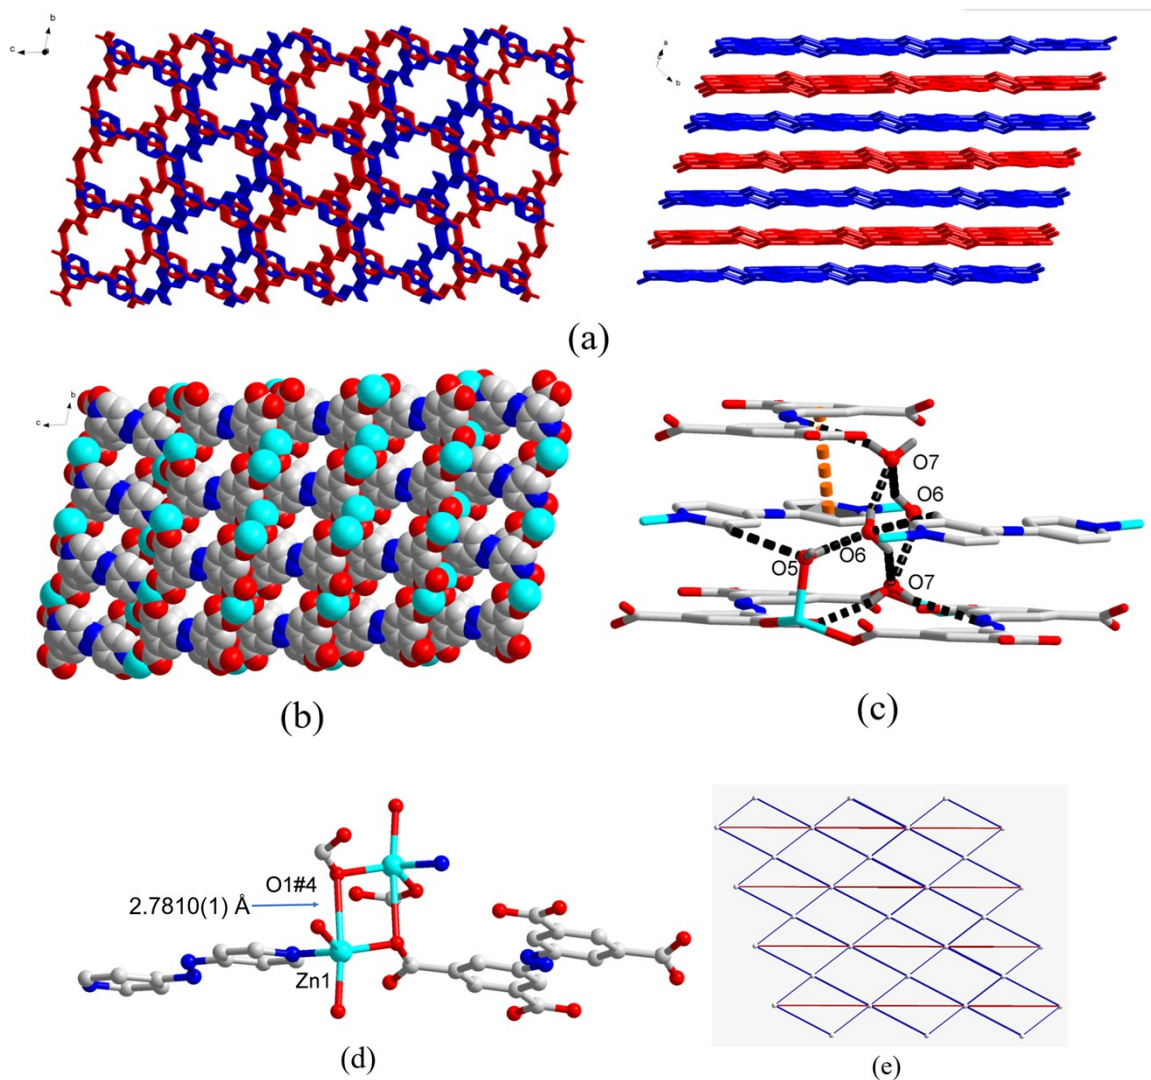

**Fig. S1.** (a) The 3D supramolecular framework formed by the stacking of the 2D coordination networks. (b) Space filling mode representation of the structure of **1** along the a-axis. (c) The hydrogen bonds and  $\pi \dots \pi$  interactions among the adjacent coordination networks and free water molecules in the pore. (d) The binuclear Zn(II) node bridged by the weak Zn-O interactions. Symmetry code: #4 -x, -y, 1-z. (e) Topological representation of the 3D framework of complex **1**.

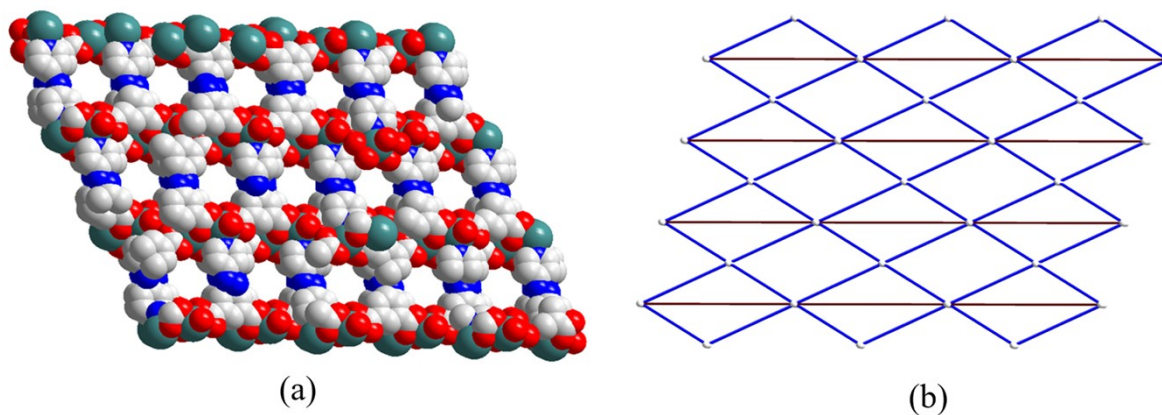

**Fig. S2.** (a) Space filling mode representation of the structure of **2** along a-axis. (b) Topological representation of the 3D framework of complex **2**.

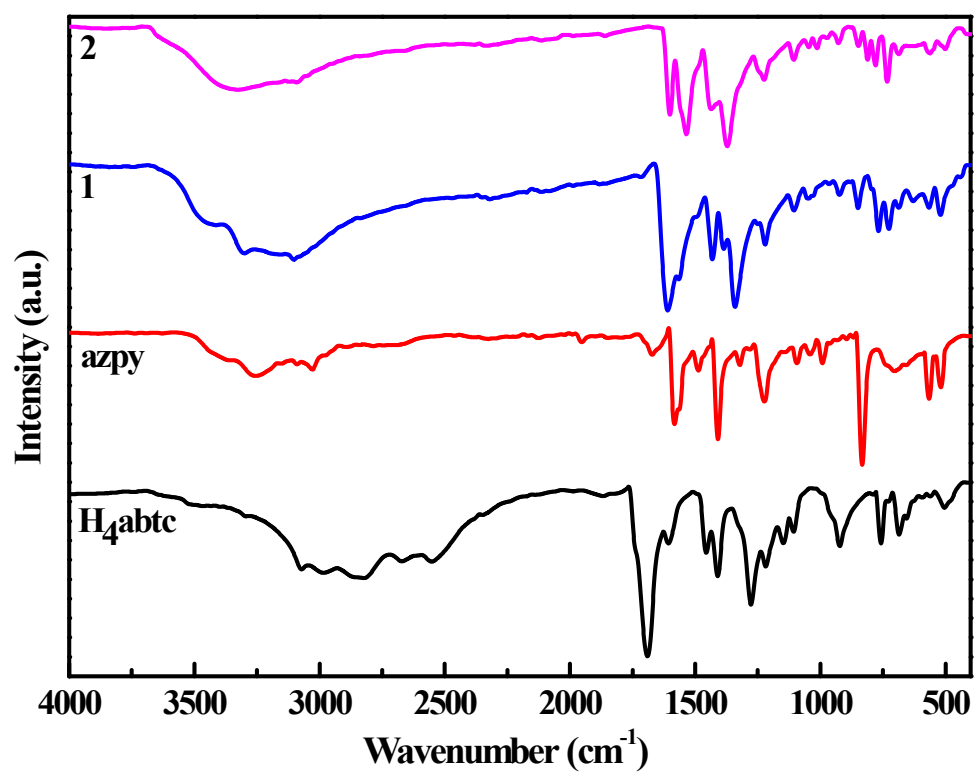

**Fig. S3.** FTIR spectra of **H<sub>4</sub>abtc**, **azpy**, and complexes **1** and **2**.

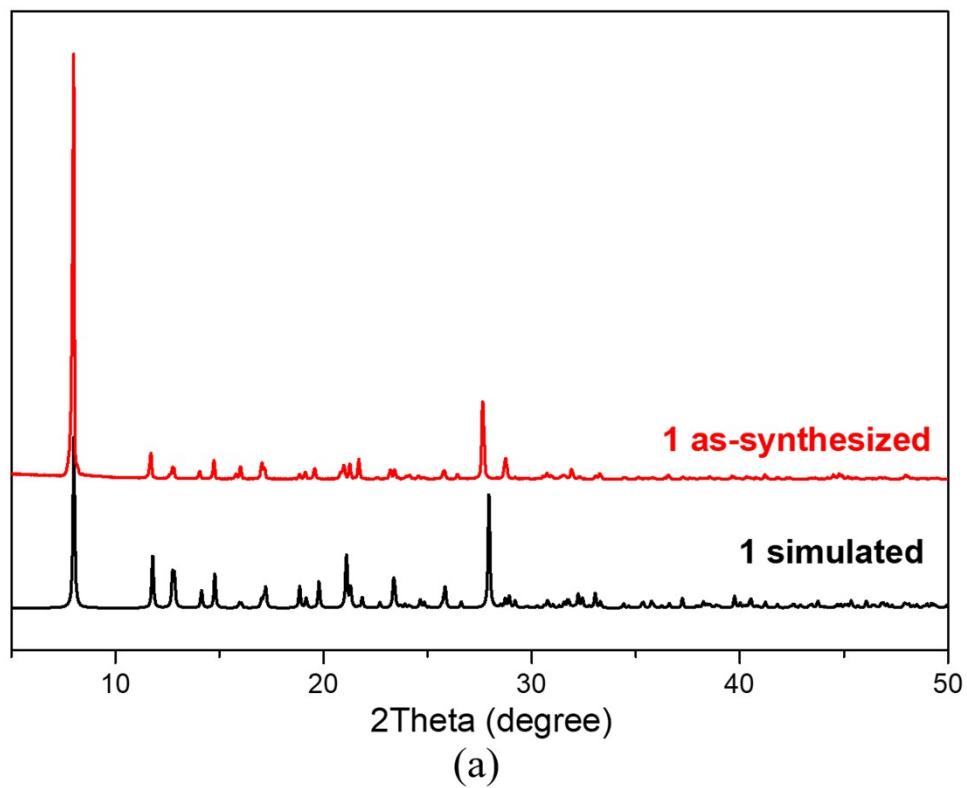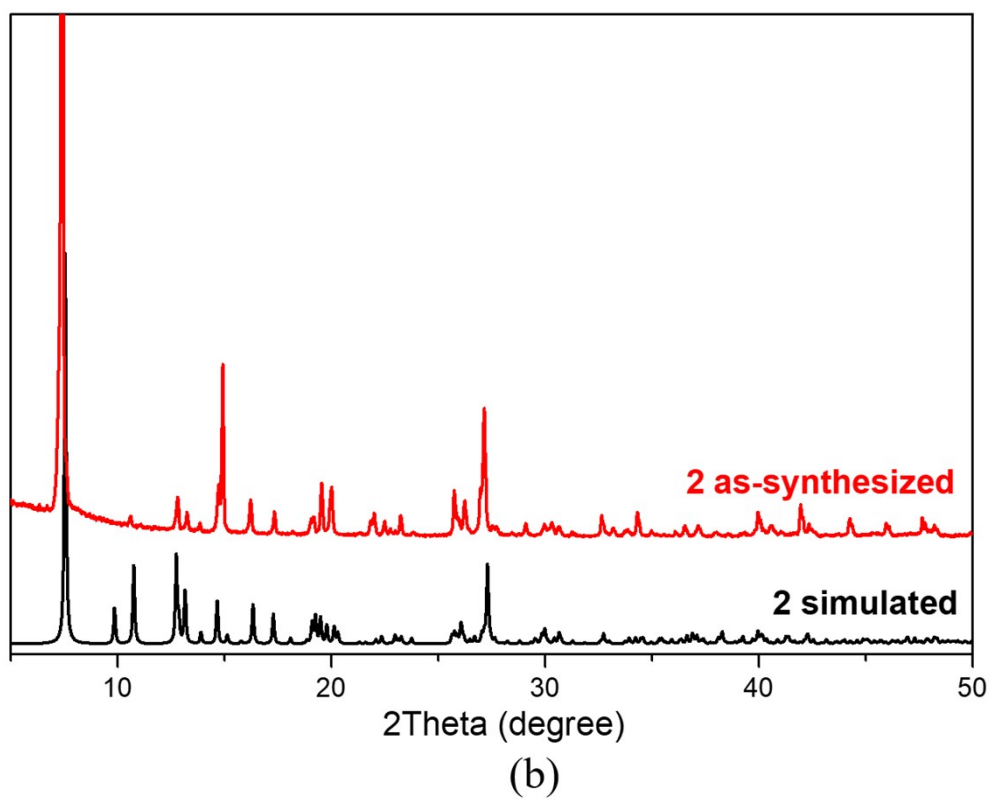

Fig. S4. PXRD patterns of 1 (a) and 2 (b).

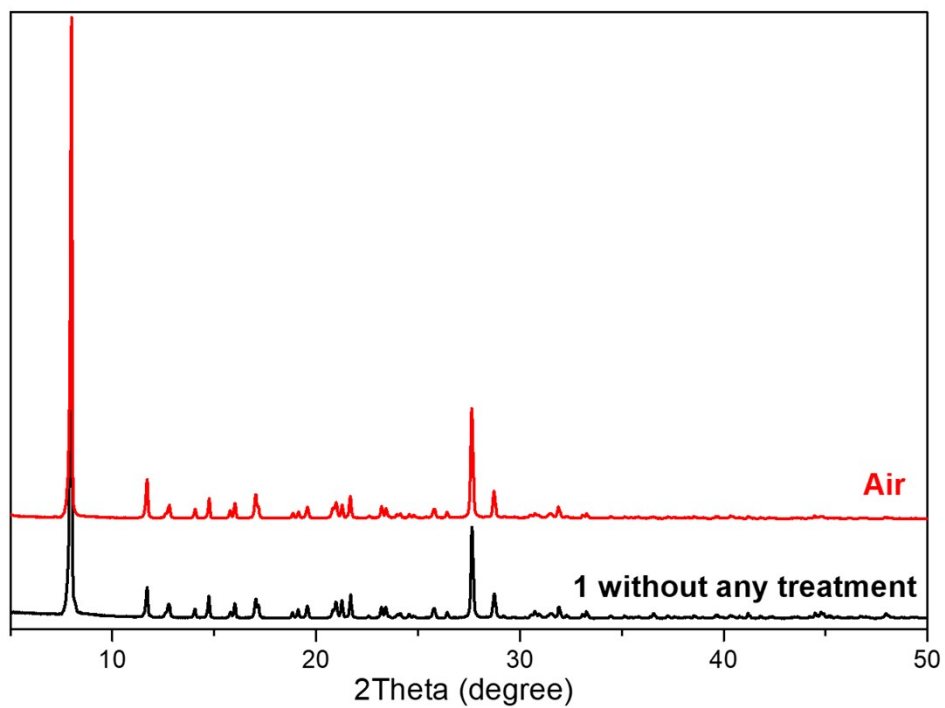

(a)

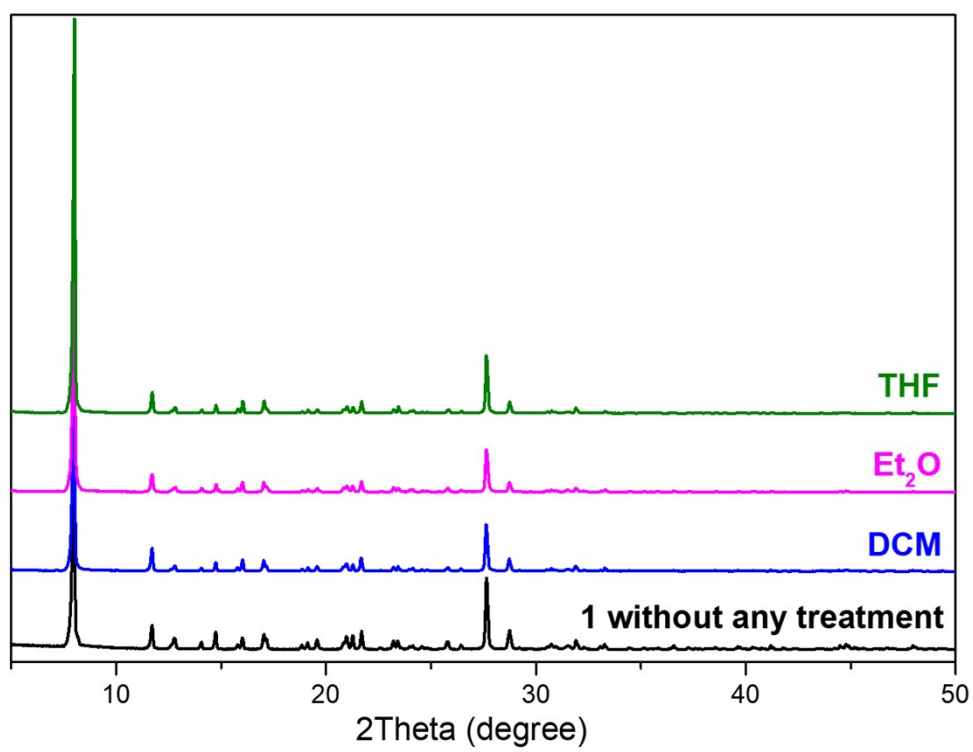

(b)

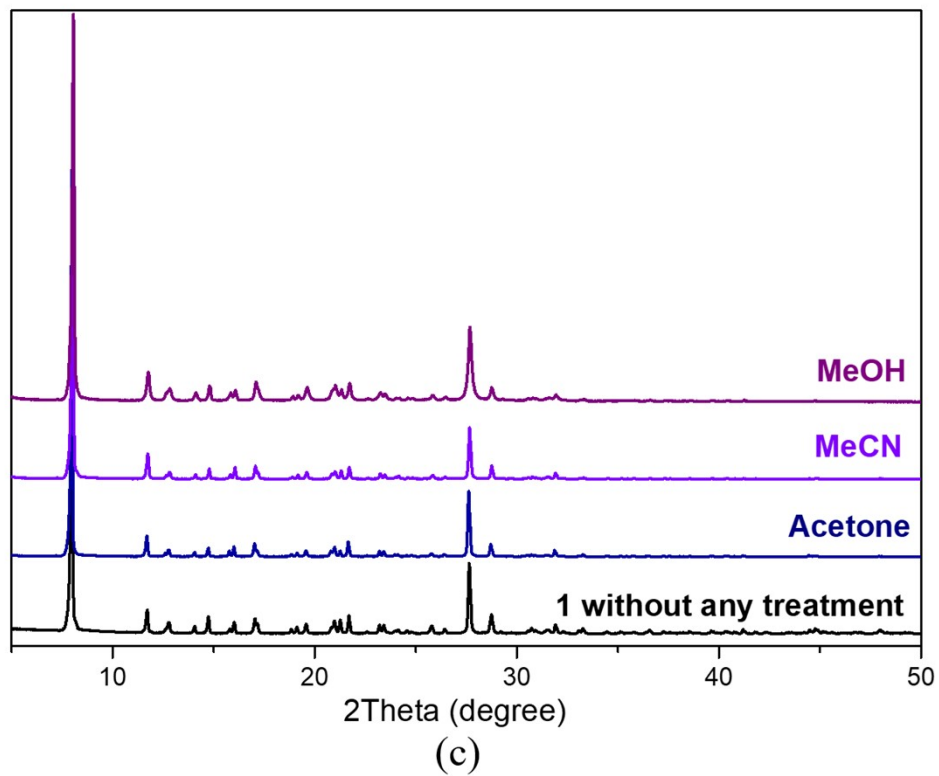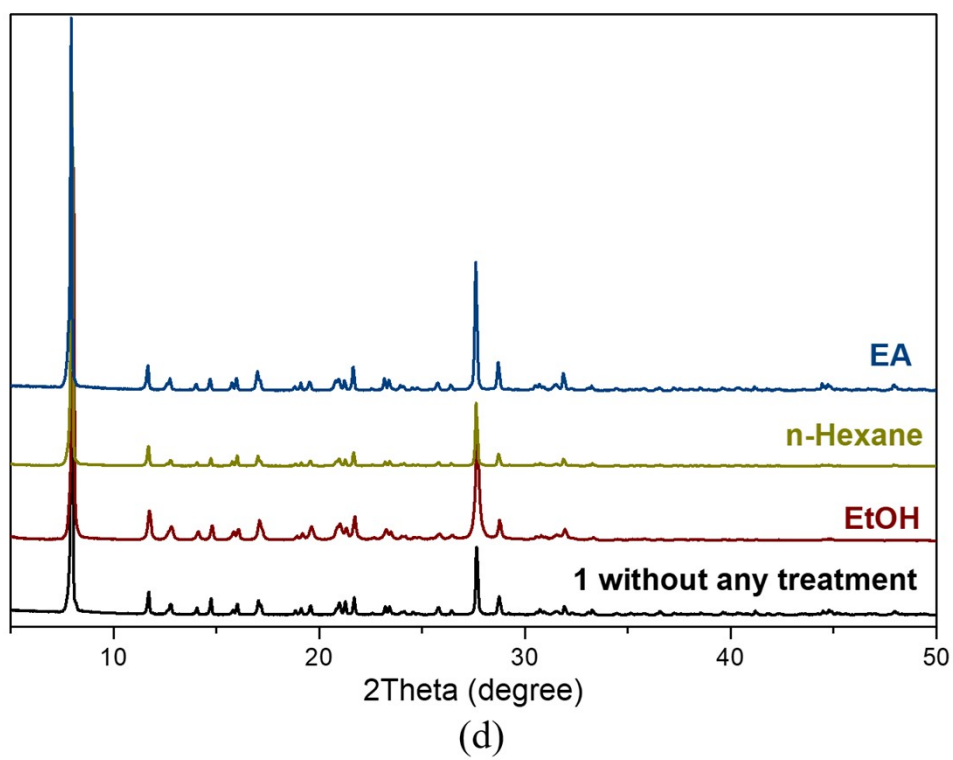



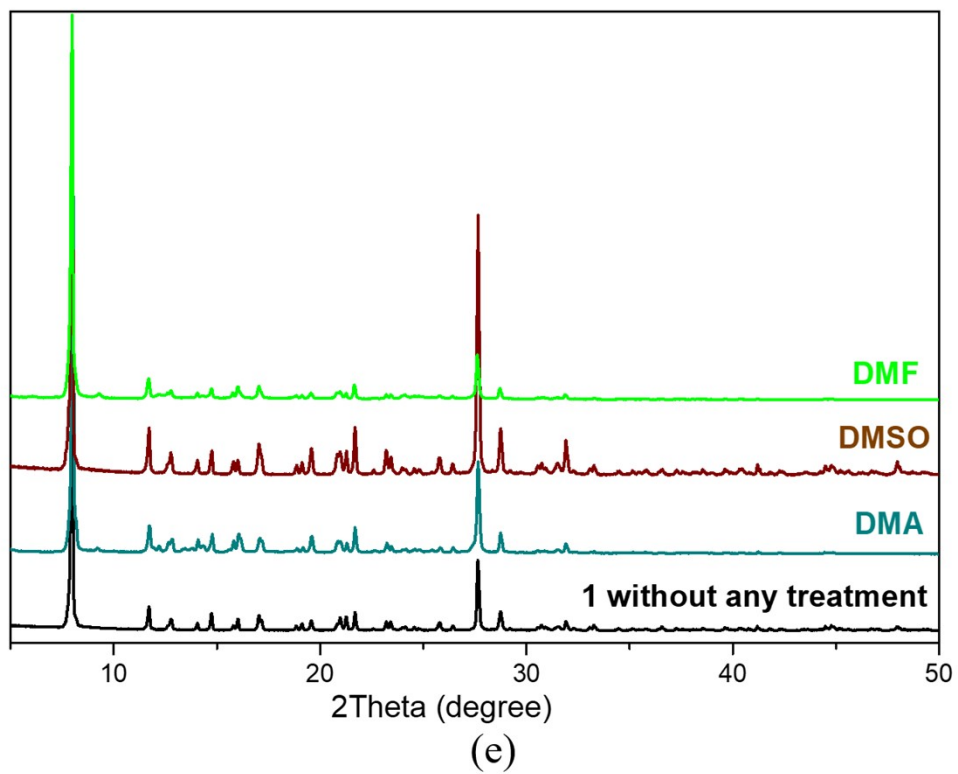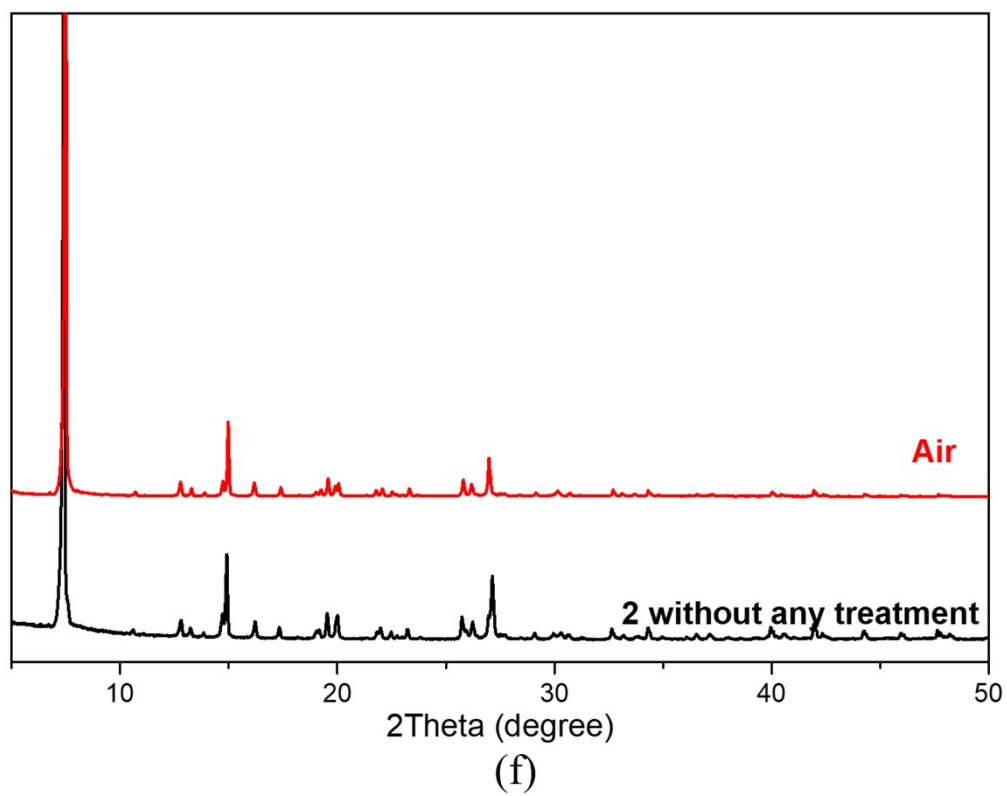

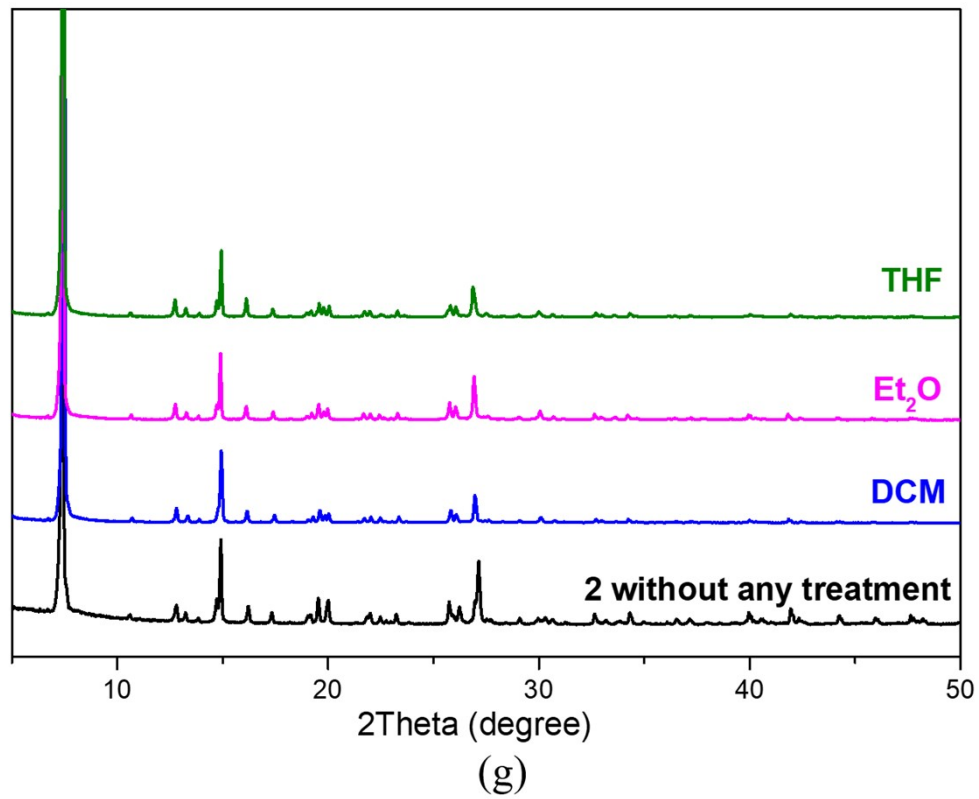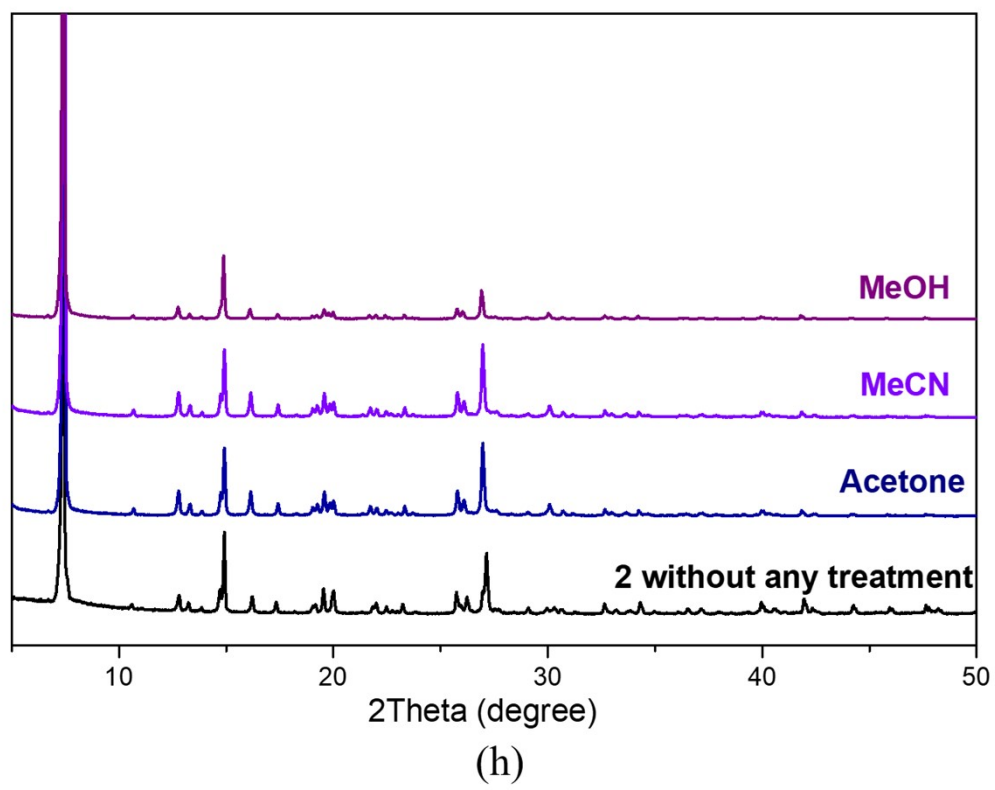

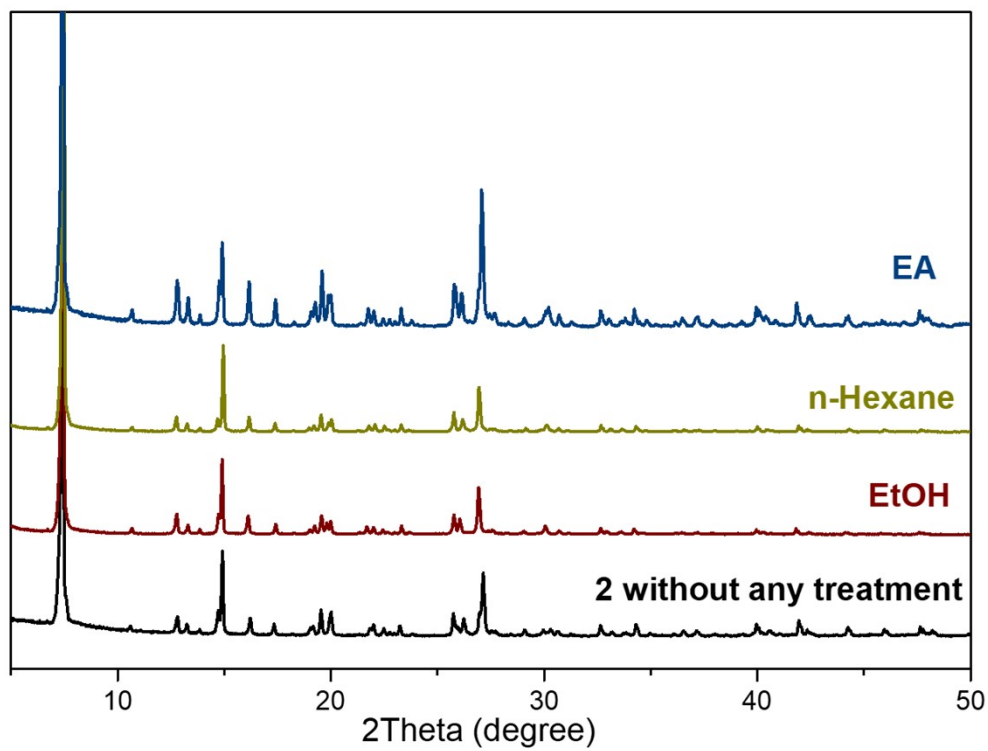

(i)

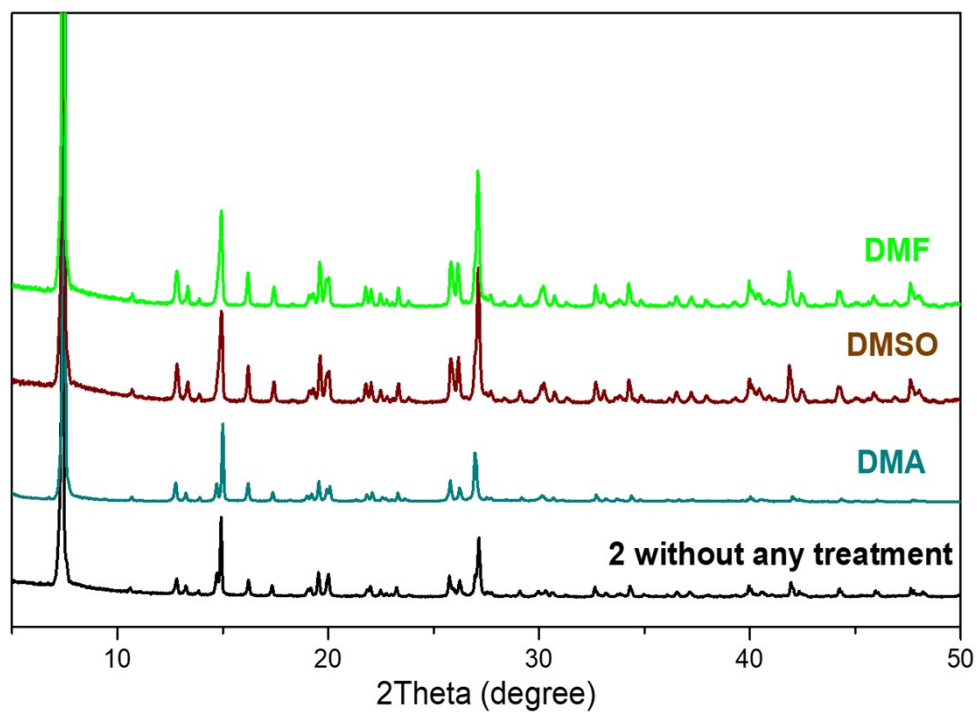

(j)

**Fig. S5.** PXRD patterns of complexes **1** (a-e) and **2** (f-j) after exposing to air for one month and immersing in different organic solvent.

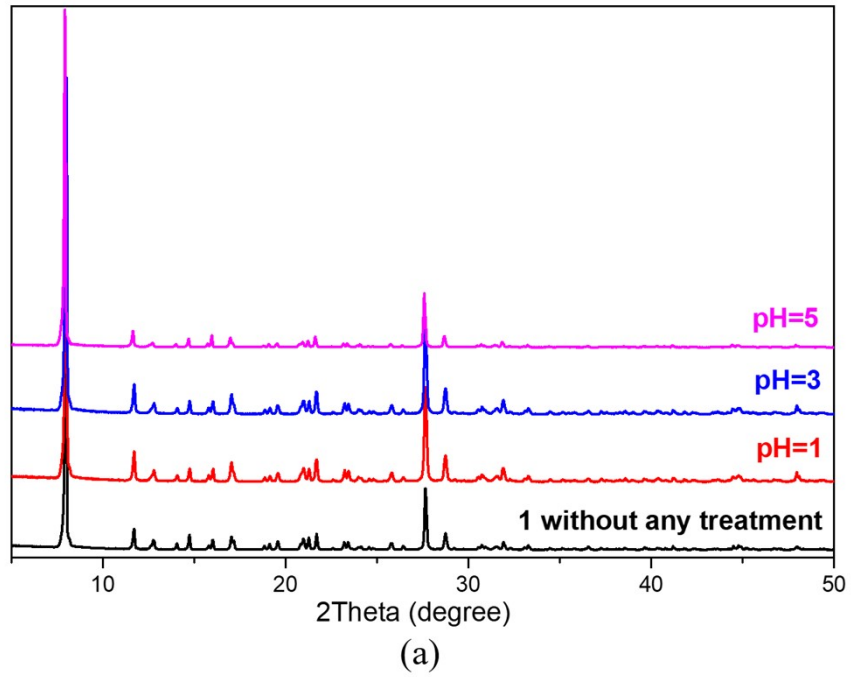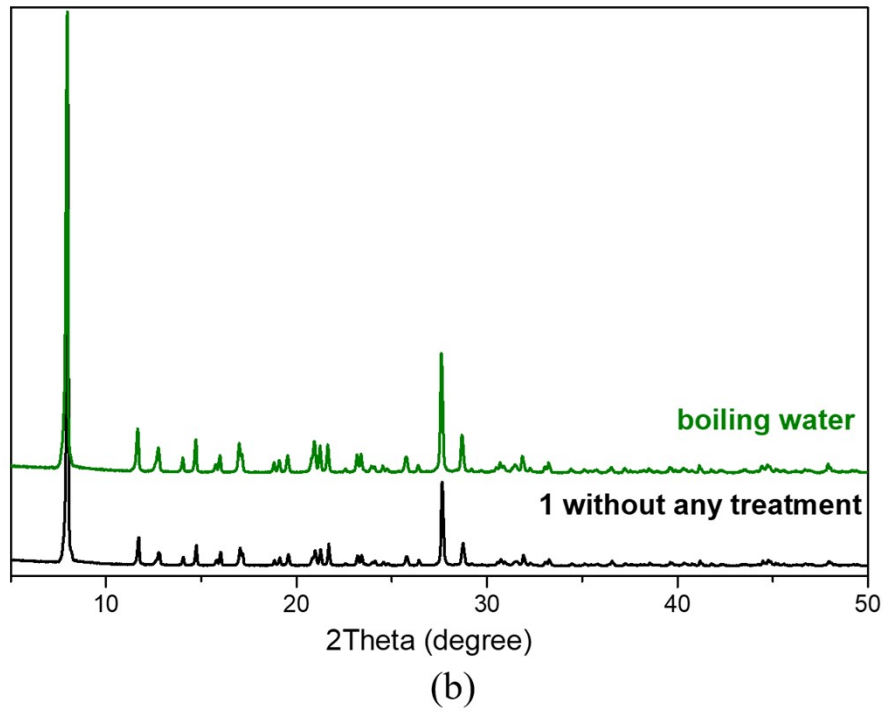

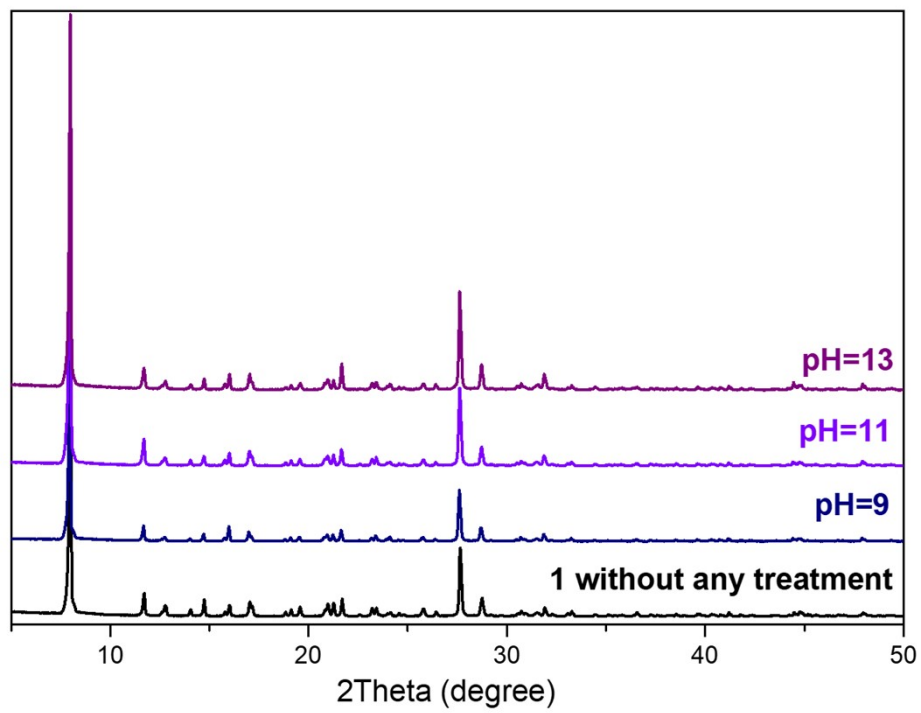

(c)

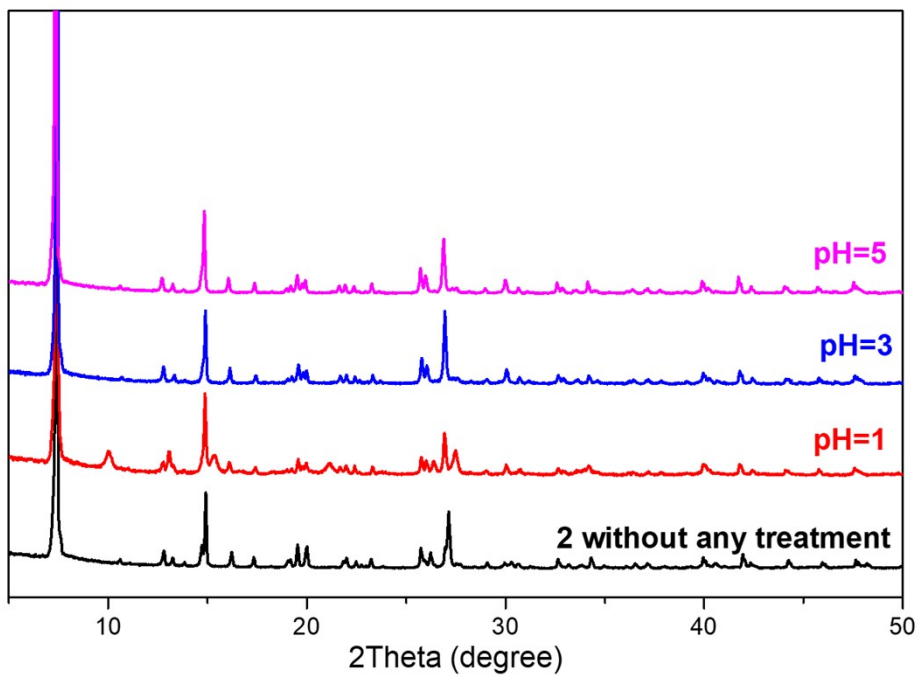

(d)

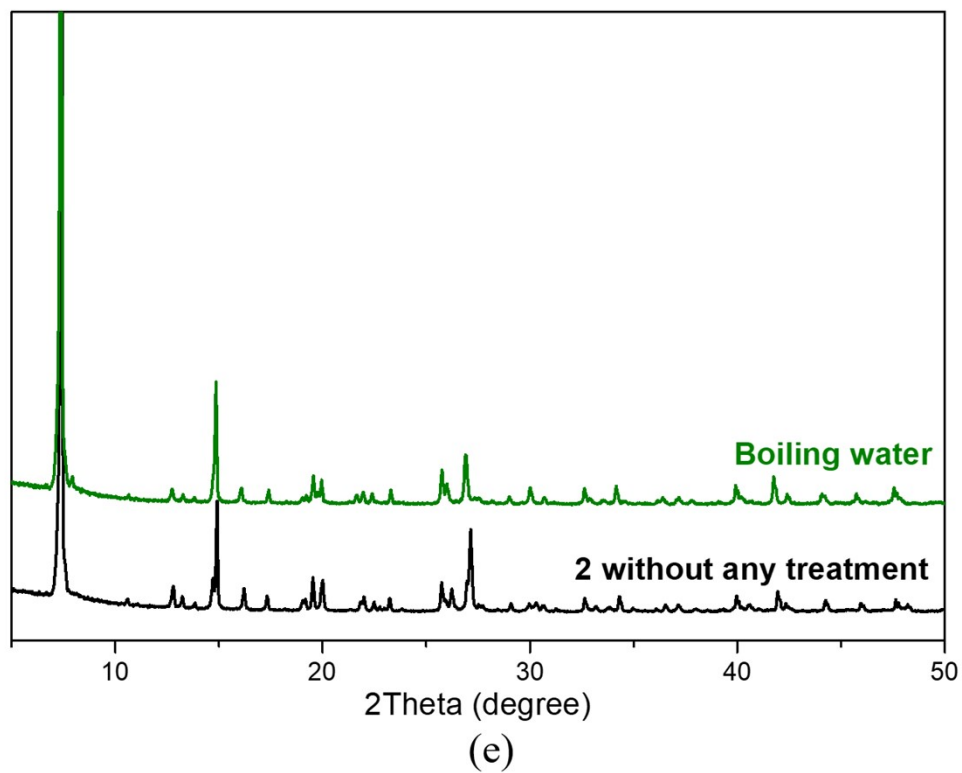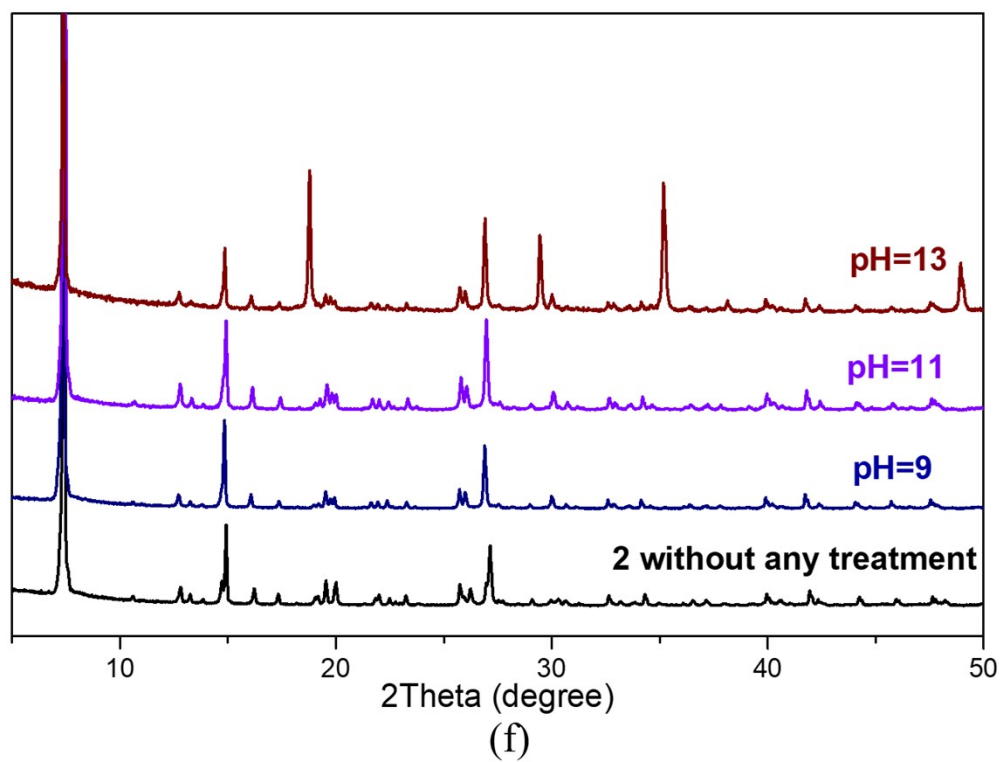

**Fig. S6.** PXRd patterns of complexes **1** (a-c) and **2** (d-f) after soaking in aqueous solution with varying pH and boiling water.

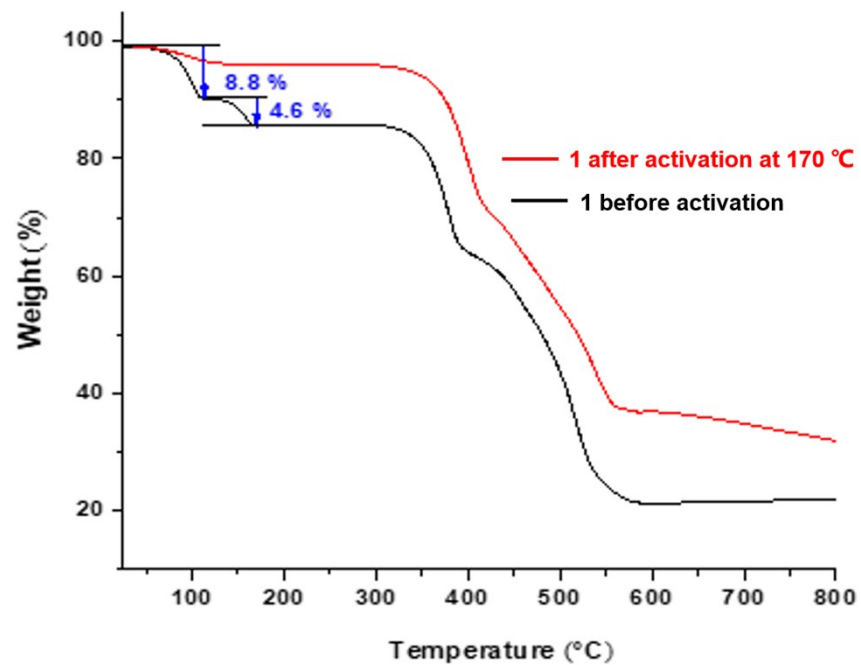

(a)

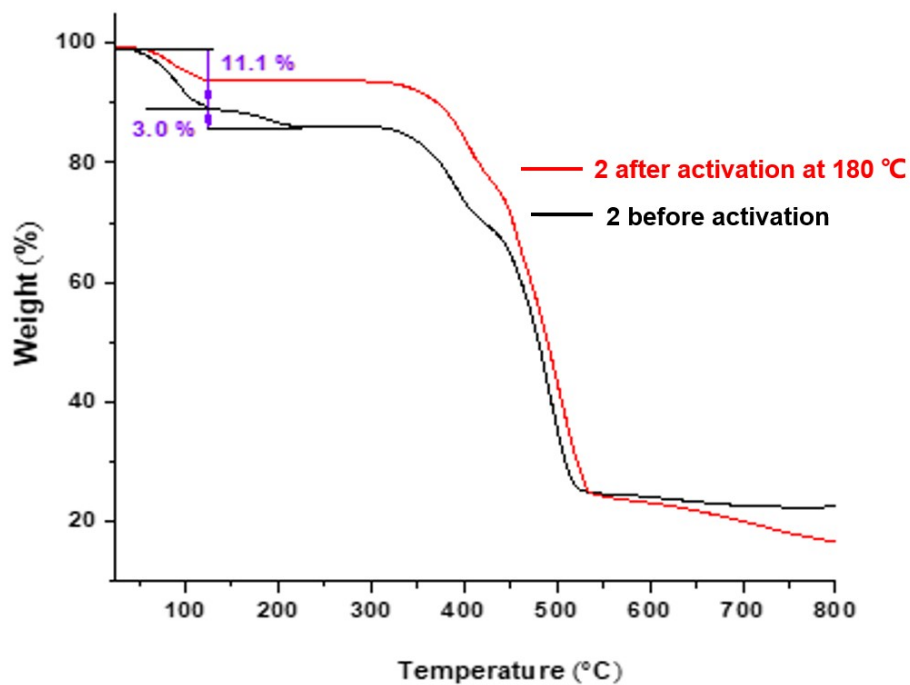

(b)

Fig. S7. TG curves of complexes 1 (a) and 2 (b) before and after activation.

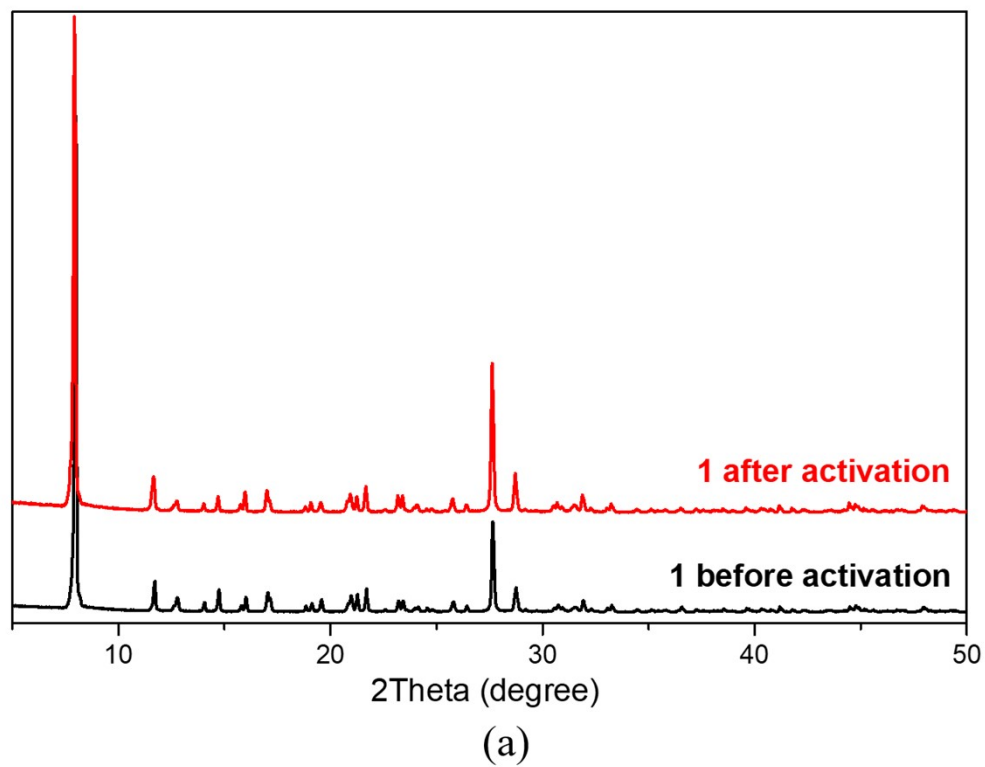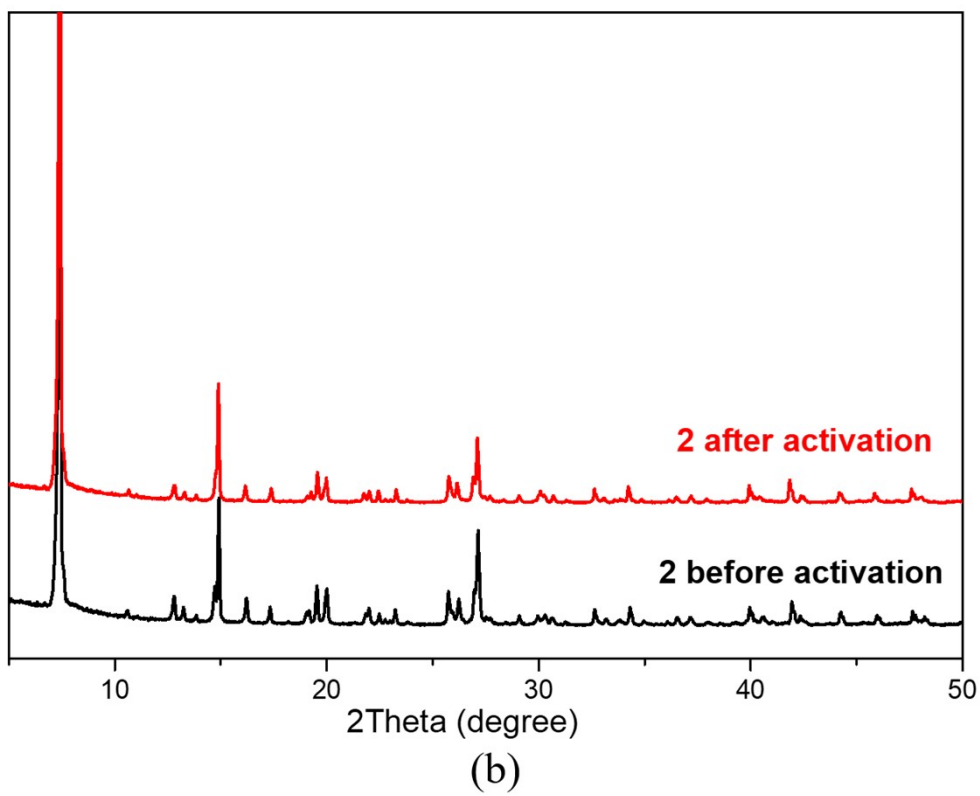

**Fig. S8.** PXRD patterns of complexes **1** (a) and **2** (b) before and after activation.



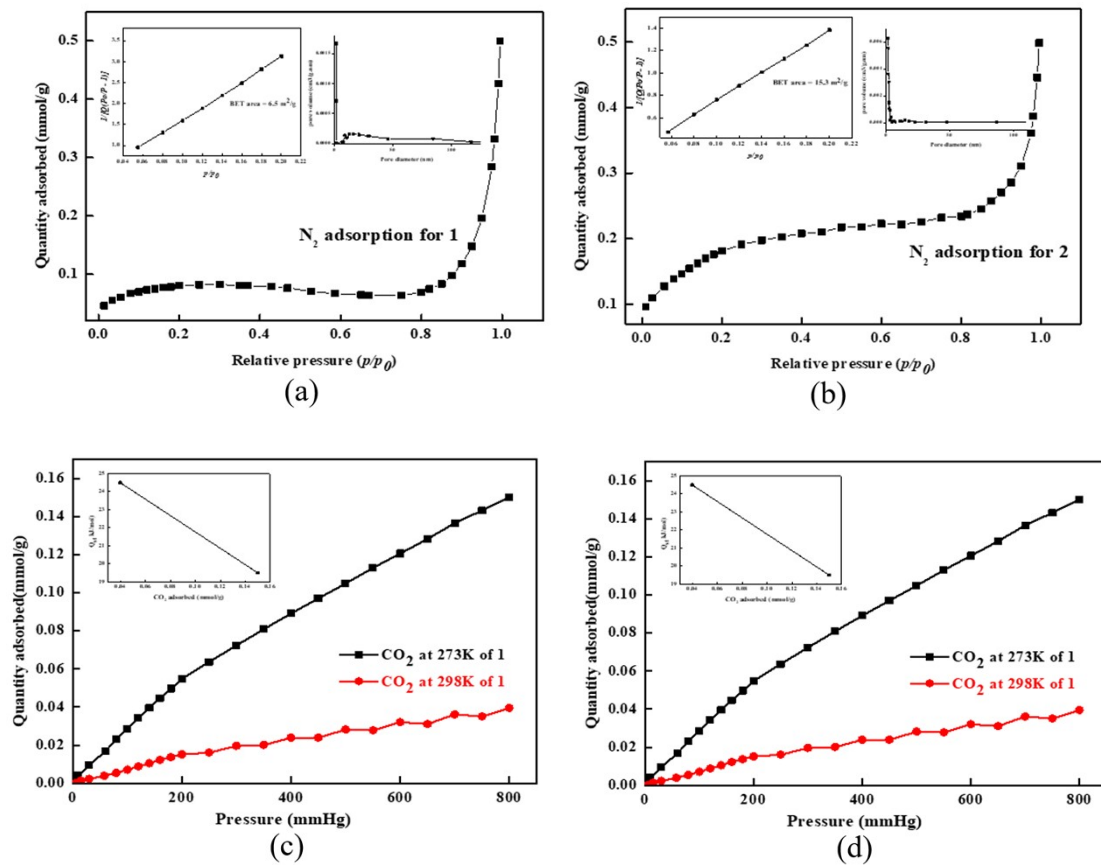

**Fig. S9.** N<sub>2</sub> adsorption isotherms, BET surface area and BJH PVD at 77 K for framework: (a) 1; (b) 2 and CO<sub>2</sub> adsorption isotherms and Isosteric heat of adsorption for framework: (c) 1; (d) 2 at 273 K and 298 K.

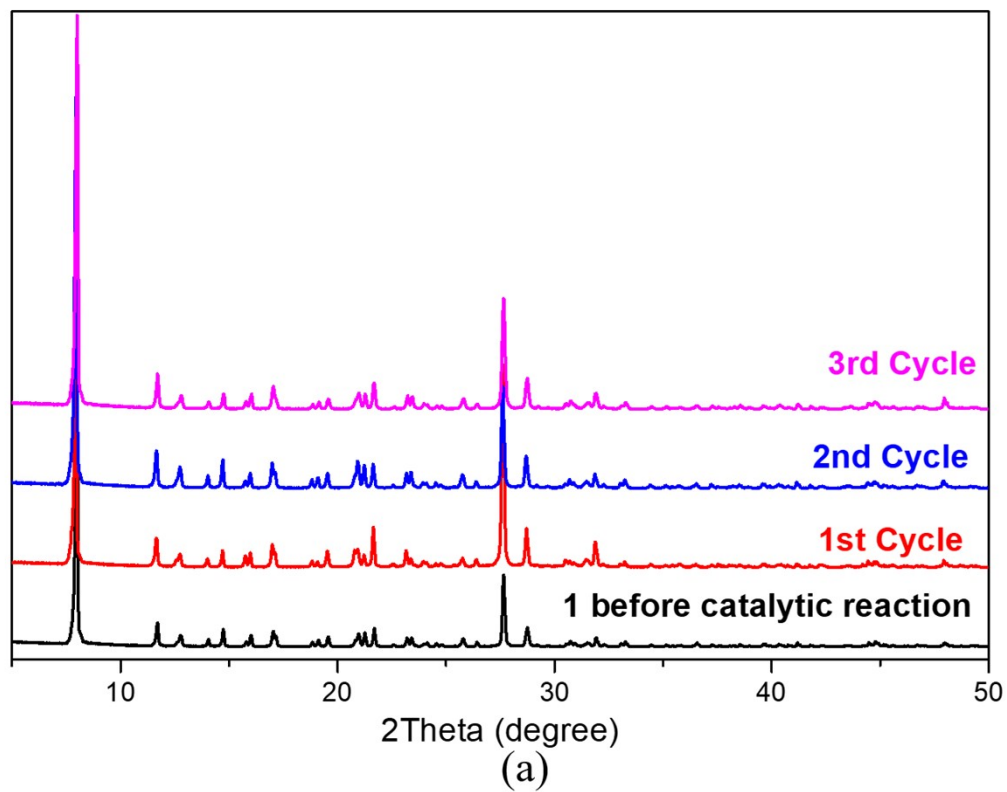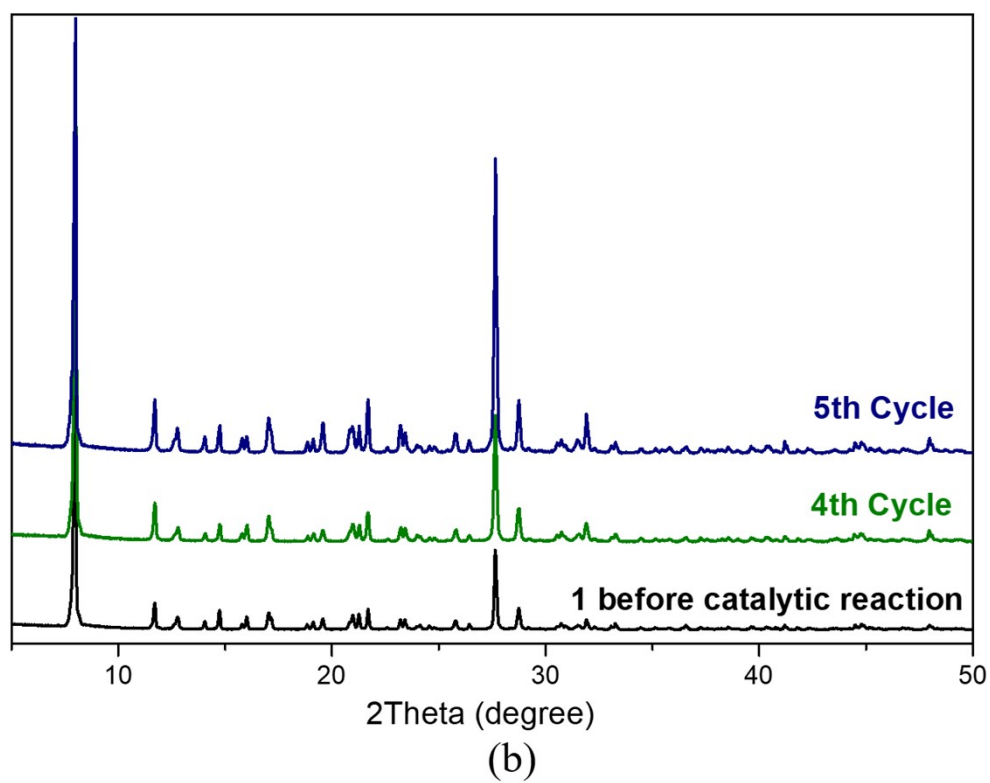

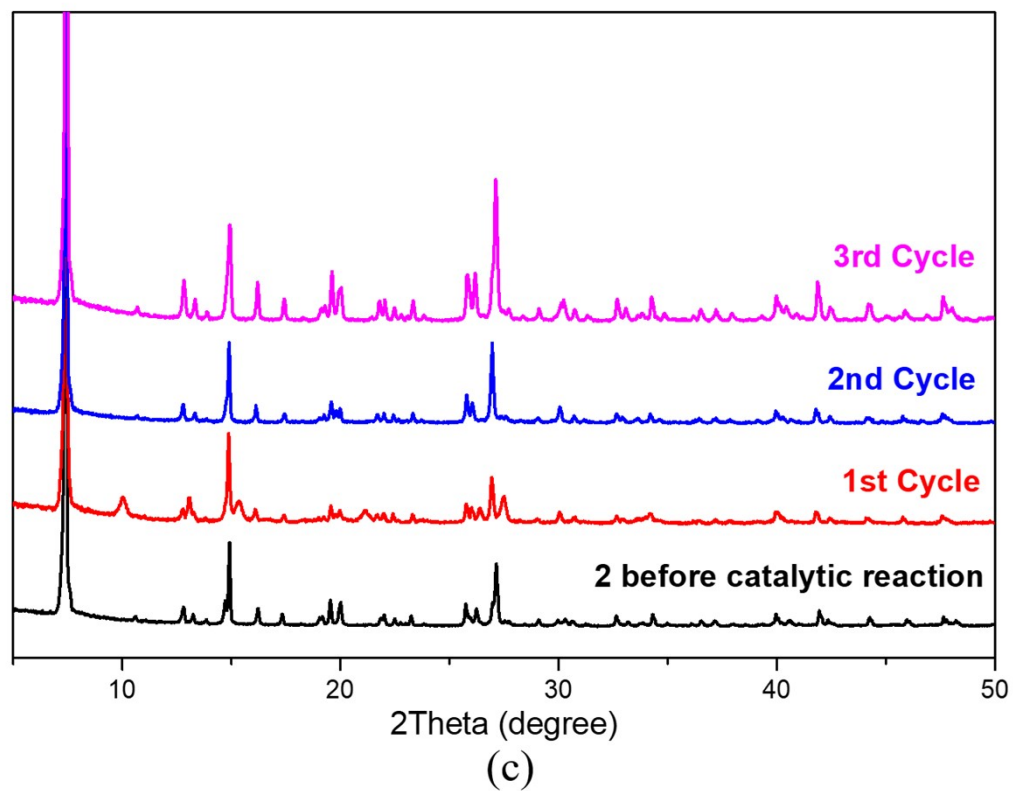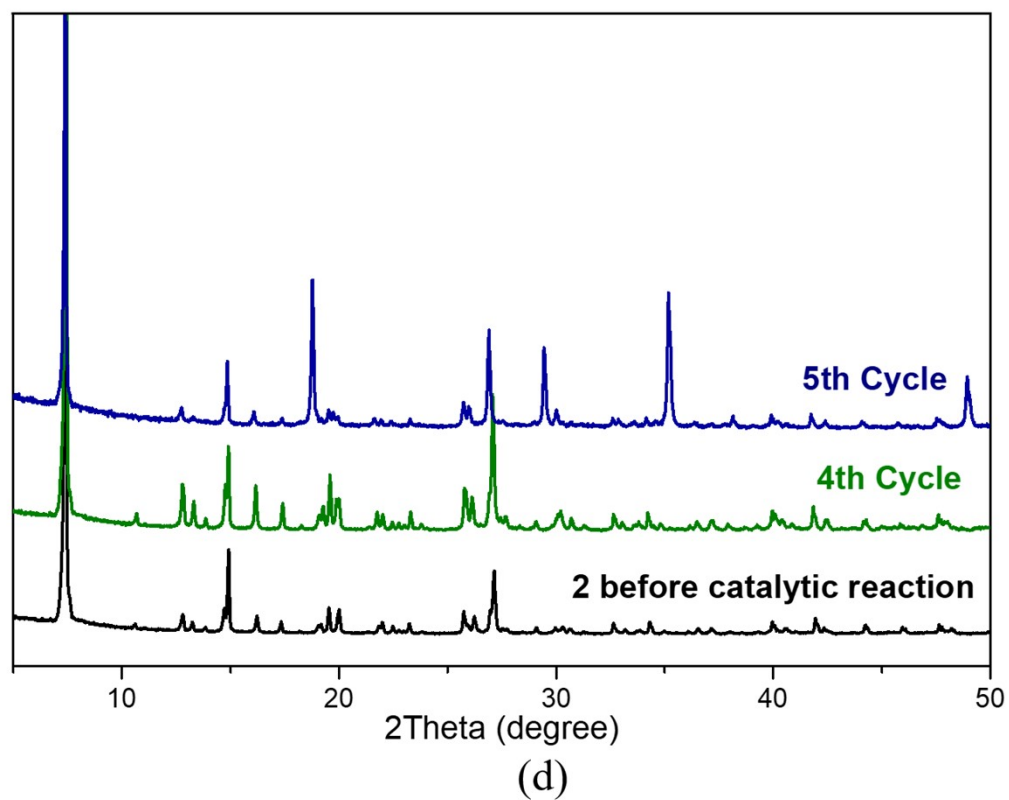

**Fig. S10.** PXRD patterns of complexes 1 (a,b) and 2 (c,d) after catalysis reactions.

## NMR and HRMS (ESI) data description.

**1. 3,3',5,5'-Azobenzene tetracarboxylic acid (H<sub>4</sub>abtc):** Orange colored solid, yield, 4.30 g, 91%.

<sup>1</sup>H NMR (400 MHz, DMSO-*d*<sub>6</sub>) δ = 13.58 (s, 4H), 8.67 (d, *J* = 7.3 Hz, 6H).

<sup>13</sup>C NMR δ: 166.31, 166.08, 152.17, 133.27, 132.96, 132.54, 128.99, 127.42, 125.17, 40.54, 40.34, 40.18, 40.12, 39.92, 39.71, 39.50, 39.29. (**Fig. S11a**)

**HRMS (ESI)** *m/z* calcd for C<sub>16</sub>H<sub>9</sub>N<sub>2</sub>O<sub>8</sub> (M-H<sup>+</sup>) 357.0359, found 357.0361.

**2. 4,4'-azobipyridine (azpy):** Orange colored solid, yield, 2.15 g, 86%. <sup>1</sup>H NMR (400 MHz, DMSO- *d*<sub>6</sub>) δ = 8.95 - 8.84 (d, 4H), 7.86 - 7.78 (d, 4H).

<sup>13</sup>C NMR δ: 156.70, 156.66, 153.19, 152.37, 152.22, 151.88, 150.30, 116.59, 116.49, 111.94, 40.61, 40.40, 40.20, 39.99, 39.78, 39.57, 39.36. (**Fig. S11b**)

**HRMS (ESI)** *m/z* calcd for C<sub>10</sub>H<sub>9</sub>N<sub>4</sub> (M+H<sup>+</sup>) 185.0827, found 185.0819.

**3. 2-phenyl-2-(phenylamino) acetonitrile:** Yellowish colored solid, yield, 84.3 mg, 93% for **1** and 86.97 mg, 96% for **2**. <sup>1</sup>H NMR (400 MHz, CDCl<sub>3</sub>) δ = 7.54 (dd, *J* = 6.6, 2.8 Hz, 2H), 7.46 – 7.36 (m, 3H), 7.23 (t, *J* = 7.8 Hz, 2H), 6.87 (t, *J* = 7.4 Hz, 1H), 6.73 (d, *J* = 7.9 Hz, 2H), 5.37 (d, *J* = 8.3 Hz, 1H), 4.07 (d, *J* = 8.3 Hz, 1H).

<sup>13</sup>C NMR δ: 144.78, 134.00, 129.64, 129.57, 129.39, 127.34, 120.27, 118.37, 114.24, 77.52, 77.20, 76.89, 50.19. (**Fig. S12**)

**HRMS (ESI)** *m/z* calcd for C<sub>14</sub>H<sub>13</sub>N<sub>2</sub> (M+H<sup>+</sup>) 209.1079, found 209.1071; calcd for C<sub>13</sub>H<sub>12</sub>N (M-CN<sup>-</sup>) 182.0964, found 182.0962.

**4. 4-phenyl-2-(phenylamino) but-3-enenitrile:** Malate colored crystalline solid, yield, 93 mg, 89% for **1** and 95 mg, 91% for **2**. <sup>1</sup>H NMR (400 MHz, CDCl<sub>3</sub>) δ = 7.47 - 7.42 (m, 2H), 7.42 - 7.23 (m, 5H), 7.05 (dd, *J* = 15.9, 1.7 Hz, 1H), 6.91 (tt, *J* = 7.4, 1.1 Hz, 1H), 6.82 – 6.74 (m, 2H), 6.28 (dd, *J* = 15.9, 5.2 Hz, 1H), 5.06 (ddd, *J* = 9.3, 5.1, 1.7 Hz, 1H), 3.91 (d, *J* = 9.3 Hz, 1H).

<sup>13</sup>C NMR δ: 144.47, 135.15, 134.94, 129.64, 128.98, 128.88, 126.98, 121.00, 120.44, 117.71, 114.43, 77.37, 77.05, 76.73, 47.80. (**Fig. S13**)

**HRMS (ESI)** *m/z* calcd for C<sub>16</sub>H<sub>15</sub>N<sub>2</sub> (M+H<sup>+</sup>) 235.1235, found 235.1223; calcd for C<sub>15</sub>H<sub>14</sub>N (M-CN<sup>-</sup>) 208.1121, found 208.1119.

**5. 4-phenyl-2-(pyridin-3-ylamino) but-3-enenitrile:** Malate colored crystalline solid, yield, 91 mg, 87% for **1** and 96 mg, 90% for **2**.  $^1\text{H}$  NMR (400 MHz,  $\text{CDCl}_3$ )  $\delta$  = 8.22 - 8.12 (m, 2H), 7.46 - 7.28 (m, 5H), 7.20 (ddd,  $J$  = 8.3, 4.7, 0.7 Hz, 1H), 7.13 - 7.01 (m, 2H), 6.26 (dd,  $J$  = 15.9, 5.2 Hz, 1H), 5.06 (ddd,  $J$  = 9.0, 5.2, 1.7 Hz, 1H), 4.36 (d,  $J$  = 9.0 Hz, 1H).

$^{13}\text{C}$  NMR  $\delta$ : 141.50, 140.79, 137.37, 135.69, 134.70, 129.15, 128.92, 127.00, 123.97, 120.41, 120.27, 117.15, 77.38, 77.06, 76.74, 47.35. (**Fig. S14**)

**HRMS (ESI)**  $m/z$  calcd for  $\text{C}_{15}\text{H}_{14}\text{N}_3$  ( $\text{M}+\text{H}^+$ ) 236.1188, found 236.1176.

**6. 2-(naphthalen-2-ylamino)-4-phenylbut-3-enenitrile:** Yellow colored solid, yield, 112 mg, 86% for **1** and 87%, 113 mg for **2**.  $^1\text{H}$  NMR (400 MHz,  $\text{CDCl}_3$ )  $\delta$  = 7.72 (ddd,  $J$  = 9.4, 7.5, 1.6 Hz, 3H), 7.46 - 7.28 (m, 7H), 7.14 - 7.04 (m, 2H), 6.95 (dd,  $J$  = 8.8, 2.4 Hz, 1H), 6.32 (dd,  $J$  = 15.9, 5.2 Hz, 1H), 5.18 (ddd,  $J$  = 9.3, 5.2, 1.7 Hz, 1H), 4.07 (d,  $J$  = 9.2 Hz, 1H).

$^{13}\text{C}$  NMR  $\delta$ : 142.07, 135.36, 134.91, 134.61, 129.63, 129.03, 128.90, 128.77, 127.72, 127.59, 127.01, 126.79, 126.58, 123.52, 120.77, 117.85, 117.63, 107.46, 77.37, 77.05, 76.73, 47.68. (**Fig. S15**)

**HRMS (ESI)**  $m/z$  calcd for  $\text{C}_{20}\text{H}_{17}\text{N}_2$  ( $\text{M}+\text{H}^+$ ) 285.1392, found 285.1385; calcd for  $\text{C}_{19}\text{H}_{16}\text{N}$  ( $\text{M}-\text{CN}^-$ ) 258.1277, found 258.1271.

**7. 2-(4-methoxyphenyl)-2-(naphthalen-2-ylamino) acetonitrile:** Light yellow colored solid, yield, 109 mg, 83% for **1** and 87%, 114 mg for **2**.  $^1\text{H}$  NMR (400 MHz,  $\text{CDCl}_3$ )  $\delta$  = 7.76 - 7.67 (m, 3H), 7.57 - 7.49 (m, 2H), 7.42 (ddd,  $J$  = 8.2, 6.9, 1.4 Hz, 1H), 7.29 (ddd,  $J$  = 8.1, 6.9, 1.2 Hz, 1H), 7.07 (d,  $J$  = 2.4 Hz, 1H), 6.97 (d,  $J$  = 2.1 Hz, 1H), 6.97 - 6.89 (m, 2H), 5.47 (s, 1H), 4.15 (s, 1H), 3.83 (s, 3H).

$^{13}\text{C}$  NMR  $\delta$ : 160.53, 142.37, 134.64, 129.54, 128.73, 128.67, 127.70, 126.76, 126.57, 125.84, 123.41, 118.37, 117.76, 114.72, 107.05, 77.37, 77.05, 76.73, 55.47, 49.64. (**Fig. S16**)

**HRMS (ESI)**  $m/z$  calcd for  $\text{C}_{19}\text{H}_{17}\text{N}_2\text{O}$  ( $\text{M}+\text{H}^+$ ) 289.1341, found 289.1337; calcd for  $\text{C}_{18}\text{H}_{16}\text{N}$  ( $\text{M}-\text{CN}^-$ ), 262.1226 found 262.1219.

**8. 2-(2-fluorophenyl)-2-(naphthalen-2-ylamino) acetonitrile:** Light yellow colored solid, yield, 105 mg, 84% for **1** and 86%, 108 mg for **2**.  $^1\text{H}$  NMR (400 MHz,  $\text{CDCl}_3$ )  $\delta$  = 7.76 - 7.64 (m, 4H), 7.50 - 7.39 (m, 2H), 7.33 - 7.15 (m, 3H), 7.09 (d,  $J$  = 2.4 Hz, 1H), 6.95 (dd,  $J$  = 8.8, 2.5 Hz, 1H), 5.74 (s, 1H), 4.23 (s, 1H).

$^{13}\text{C}$  NMR  $\delta$ : 161.41, 158.92, 142.03, 134.56, 131.86, 131.78, 129.61, 129.03, 129.00, 128.82, 127.71, 126.79, 126.61, 125.16, 125.12, 123.58, 121.63, 121.49, 117.79, 117.54, 116.53, 116.32, 107.48, 77.36, 77.05, 76.73, 44.70, 44.65. (**Fig. S17**)

**HRMS (ESI)**  $m/z$  calcd for  $\text{C}_{18}\text{H}_{14}\text{FN}_2$  ( $\text{M}+\text{H}^+$ ) 277.1137, found 277.1141; calcd for  $\text{C}_{17}\text{H}_{13}\text{FN}$  ( $\text{M}-\text{CN}^-$ ) 250.1021, found 262.1019.

**9. (2-fluorophenyl)amino-4-phenylbut-3-enenitrile:** Light malate colored crystalline product, yield, 85%, 95mg for **1** and 98mg, 87% for **2**.  $^1\text{H}$  NMR (400 MHz,  $\text{CDCl}_3$ )  $\delta$  = 7.47 - 7.42 (m, 2H), 7.41 - 7.29 (m, 3H), 7.20 - 6.97 (m, 3H), 6.94 - 6.80 (m, 2H), 6.30 (dd,  $J$  = 15.9, 5.2 Hz, 1H), 5.09 (ddd,  $J$  = 9.2, 5.2, 1.7 Hz, 1H), 4.20 (dd,  $J$  = 9.5, 2.9 Hz, 1H).

$^{13}\text{C}$  NMR  $\delta$ : 153.32, 150.93, 135.58, 134.80, 132.96, 132.84, 129.08, 128.89, 127.02, 124.87, 124.84, 120.51, 120.22, 120.15, 117.35, 115.35, 115.17, 114.06, 114.03, 77.36, 77.04, 76.72, 47.48. (**Fig. S18**)

**HRMS (ESI)**  $m/z$  calcd for  $\text{C}_{16}\text{H}_{14}\text{FN}_2$  ( $\text{M}+\text{H}^+$ ) 253.1141, found 253.1137, calcd for  $\text{C}_{15}\text{H}_{13}\text{FN}$  ( $\text{M}-\text{CN}^-$ ) 226.1016, found 226.1020.

**10. 2-(4-methoxyphenyl)-2-(phenylamino) acetonitrile:** Whitish yellow colored crystalline product, yield, 88 mg, 83% for **1** and 90 mg, 85% for **2**.  $^1\text{H}$  NMR (400 MHz,  $\text{CDCl}_3$ )  $\delta$  = 7.47 - 7.39 (m, 2H), 7.24 - 7.15 (m, 2H), 6.93 - 6.85 (m, 2H), 6.82 (tt,  $J$  = 7.4, 1.1 Hz, 1H), 6.73 - 6.65 (m, 2H), 5.28 (d,  $J$  = 7.9 Hz, 1H), 3.91 (d,  $J$  = 8.0 Hz, 1H), 3.76 (s, 3H).

$^{13}\text{C}$  NMR  $\delta$ : 159.41, 143.72, 128.53, 127.60, 124.93, 119.16, 117.40, 113.62, 113.08, 76.32, 76.01, 75.69, 54.41, 48.65. (**Fig. S19**)

**HRMS (ESI)**  $m/z$  calcd for  $\text{C}_{15}\text{H}_{15}\text{N}_2\text{O}$  ( $\text{M}+\text{H}^+$ ) 239.1184, found 239.1179; calcd for  $\text{C}_{14}\text{H}_{14}\text{N}$  ( $\text{M}-\text{CN}^-$ ) 212.1070, found 212.1069.

**11. 2-(4-methoxyphenyl)-2-(pyridine-3-ylamino) acetonitrile:** Whitish yellow colored crystalline product, yield, 87 mg, 82% for **1** and 89 mg, 84% for **2**.  $^1\text{H}$  NMR (400 MHz,  $\text{CDCl}_3$ )  $\delta$  = 8.24 - 8.01 (m, 2H), 7.55 - 7.46 (m, 2H), 7.20 (dd,  $J$  = 8.3, 4.7 Hz, 1H), 7.08 (ddd,  $J$  = 8.3, 3.0, 1.4 Hz, 1H), 7.02 - 6.94 (m, 2H), 5.37 (d,  $J$  = 8.0 Hz, 1H), 4.22 (d,  $J$  = 8.0 Hz, 1H), 3.84 (s, 3H).

$^{13}\text{C}$  NMR  $\delta$ : 160.65, 141.45, 140.87, 137.24, 128.64, 125.15, 123.91, 120.15, 117.78, 114.81, 77.34, 77.03, 76.71, 55.47, 49.28. (**Fig. S20**)

**HRMS (ESI)**  $m/z$  calcd for  $\text{C}_{14}\text{H}_{14}\text{N}$  ( $\text{M}-\text{CN}^-$ ) 213.1022, found 213.1020.

**12. 2-((2-fluorophenyl)amino)-2-(4-methoxyphenyl) acetonitrile:** Whitish yellow colored crystalline product, yield, 93 mg, 81% for **1** and 95 mg, 83% for **2**.  $^1\text{H NMR}$  (400 MHz,  $\text{CDCl}_3$ )  $\delta$  = 7.56 - 7.48 (m, 2H), 7.13 - 7.00 (m, 2H), 7.00 - 6.95 (m, 2H), 6.91 (td,  $J$  = 8.3, 1.6 Hz, 1H), 6.83 (dddd,  $J$  = 8.1, 7.5, 5.0, 1.6 Hz, 1H), 5.39 (d,  $J$  = 8.1 Hz, 1H), 4.25 (dd,  $J$  = 8.1, 3.1 Hz, 1H), 3.84 (s, 3H).

$^{13}\text{C NMR}$   $\delta$ : 160.58, 153.17, 150.78, 133.26, 133.14, 128.66, 125.45, 124.84, 124.80, 119.97, 119.90, 118.08, 115.23, 115.05, 114.74, 113.82, 113.79, 77.35, 77.23, 77.03, 76.71, 55.45, 49.37.

(Fig. S21)

**HRMS (ESI)**  $m/z$  calcd for  $\text{C}_{15}\text{H}_{14}\text{FN}_2\text{O}$  ( $\text{M}+\text{H}^+$ ) 257.1090, found 257.1077; calcd for  $\text{C}_{14}\text{H}_{13}\text{FNO}$  ( $\text{M}-\text{CN}^-$ ) 230.0976, found 230.0970.

**13. 2-(2-fluorophenyl)-2-(pyridine-4-ylamino) acetonitrile:** Whitish yellow colored crystalline product, yield, 84 mg, 83% for **1** and 86 mg, 85% for **2**.  $^1\text{H NMR}$  (400 MHz,  $\text{CDCl}_3$ )  $\delta$  = 8.18 (d,  $J$  = 2.8 Hz, 1H), 8.13 (dd,  $J$  = 4.7, 1.4 Hz, 1H), 7.64 (td,  $J$  = 7.6, 1.8 Hz, 1H), 7.55 - 7.33 (m, 1H), 7.28 - 7.10 (m, 4H), 5.63 (d,  $J$  = 8.4 Hz, 1H), 4.63 (d,  $J$  = 7.7 Hz, 1H).

$^{13}\text{C NMR}$   $\delta$ : 161.31, 158.82, 141.50, 140.80, 137.26, 132.05, 131.97, 128.98, 128.96, 125.20, 125.16, 124.00, 121.04, 120.91, 120.38, 117.05, 116.54, 116.33, 77.37, 77.05, 76.74, 44.30, 44.26.

(Fig. S22)

**HRMS (ESI)**  $m/z$  calcd for  $\text{C}_{13}\text{H}_{11}\text{FN}_3$  ( $\text{M}+\text{H}^+$ ) 228.0937, found 228.0925.

**14. 2-(2-fluorophenyl)-2-((2-fluorophenyl) amino) acetonitrile:** Whitish yellow colored crystalline product, yield, 85%, 93 mg for **1** and 88%, 96 mg for **2**.  $^1\text{H NMR}$  (400 MHz,  $\text{CDCl}_3$ )  $\delta$  = 7.67-7.62 (td,  $J$  = 7.6, 1.8 Hz, 1H), 7.44 (dddd,  $J$  = 8.2, 7.2, 5.3, 1.8 Hz, 1H), 7.25 (td,  $J$  = 7.6, 1.2 Hz, 1H), 7.17 (ddd,  $J$  = 9.7, 8.3, 1.2 Hz, 1H), 7.09 (tt,  $J$  = 7.7, 1.1 Hz, 1H), 7.04 (ddd,  $J$  = 11.4, 8.1, 1.4 Hz, 1H), 6.94 (td,  $J$  = 8.3, 1.6 Hz, 1H), 6.91 - 6.77 (m, 1H), 5.64 (d,  $J$  = 8.6 Hz, 1H), 4.34 (d,  $J$  = 5.9 Hz, 1H).

$^{13}\text{C NMR}$   $\delta$ : 161.35, 158.87, 153.29, 150.90, 132.93, 132.81, 131.97, 131.89, 129.00, 128.97, 125.18, 125.14, 124.89, 124.86, 121.33, 121.19, 120.37, 120.30, 117.31, 116.52, 116.31, 115.35, 115.16, 114.07, 114.04, 77.40, 77.08, 76.76, 44.37. (Fig. S23)

**HRMS (ESI)**  $m/z$  calcd for  $\text{C}_{14}\text{H}_{11}\text{F}_2\text{N}_2$  ( $\text{M}+\text{H}^+$ ) 245.0890, found 245.076; calcd for  $\text{C}_{13}\text{H}_{10}\text{F}_2\text{N}$  ( $\text{M}-\text{CN}^-$ ) 218.0776, found 218.0769.

**$^1\text{H}$  and  $^{13}\text{C}$  NMR spectra for  $\text{H}_4\text{abtc}$ , azpy linkers, and Cyanosilylation reaction products.**

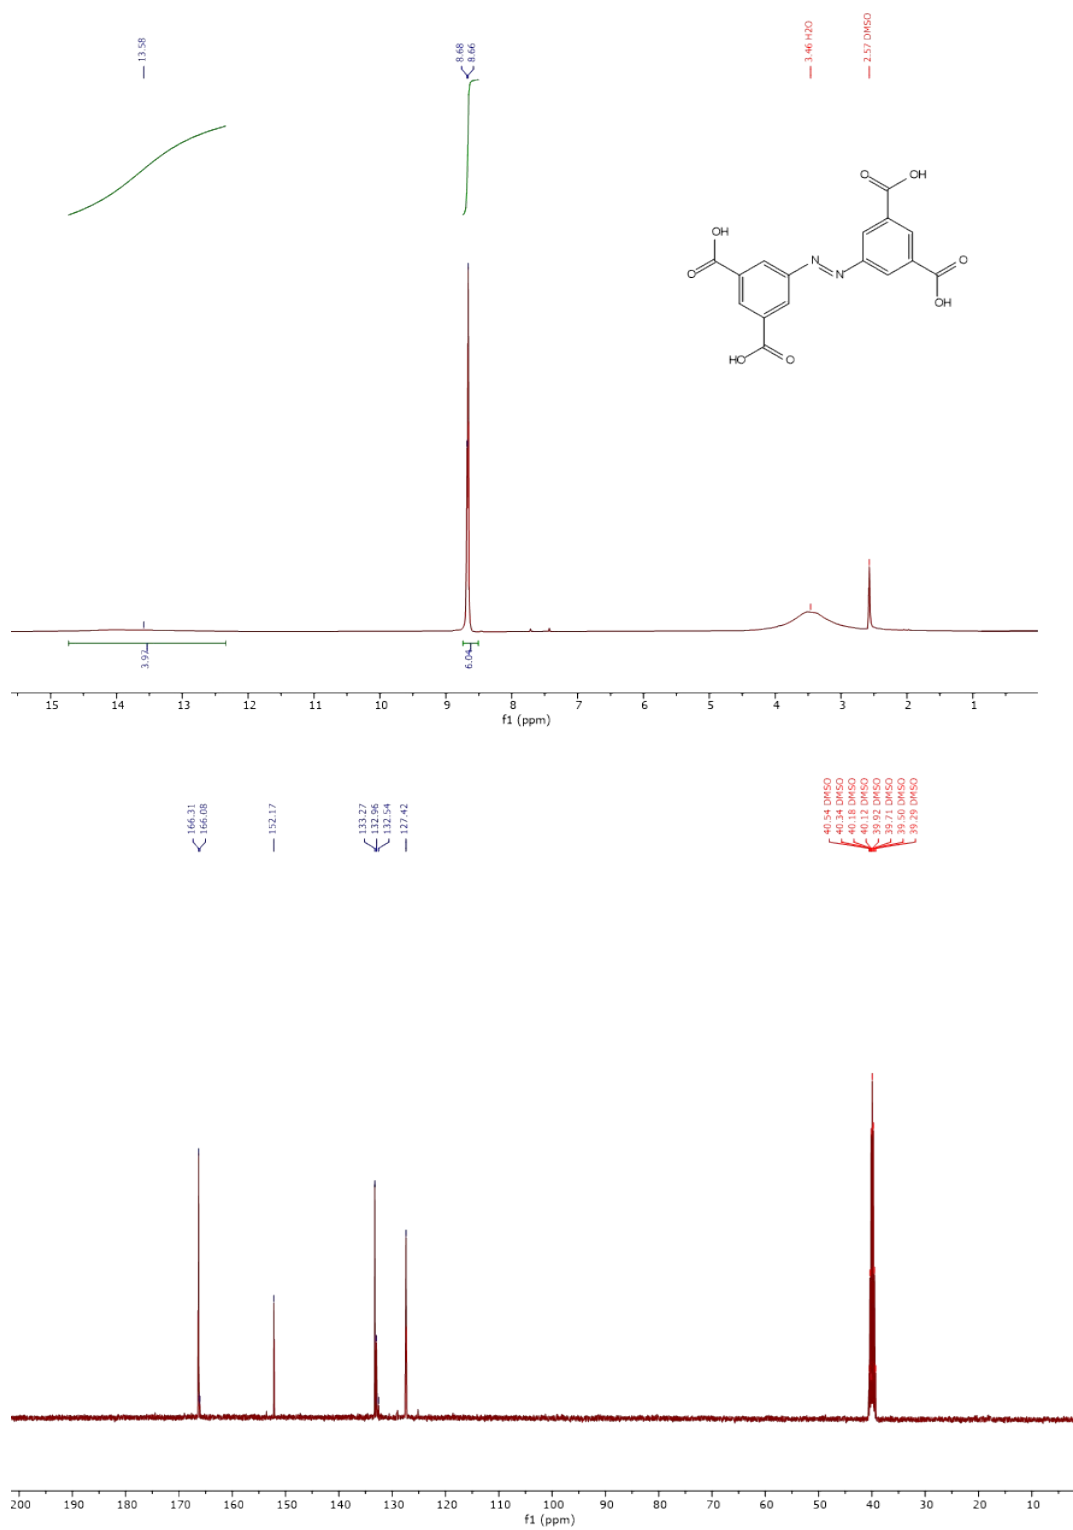

**Fig. S11a.**  $^1\text{H}$  and  $^{13}\text{C}$  NMR of  $\text{H}_4\text{abtc}$ .





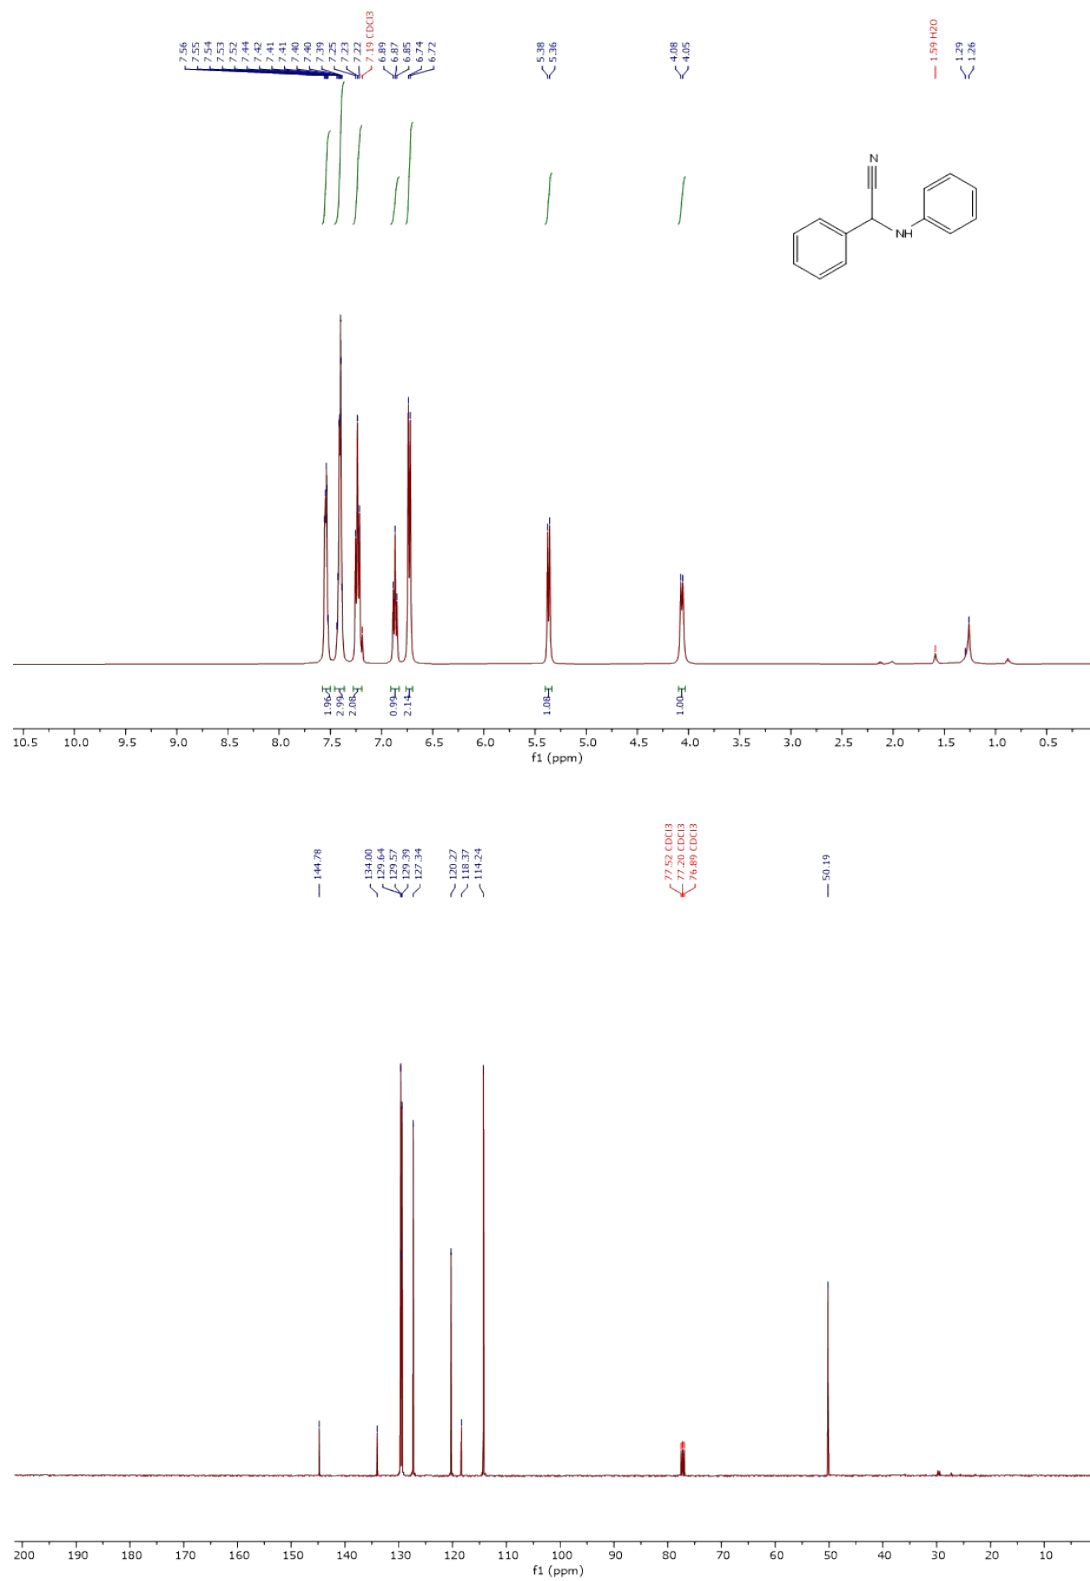

**Fig. S12.** <sup>1</sup>H and <sup>13</sup>C NMR of 2-phenyl-2-(phenylamino)acetonitrile.

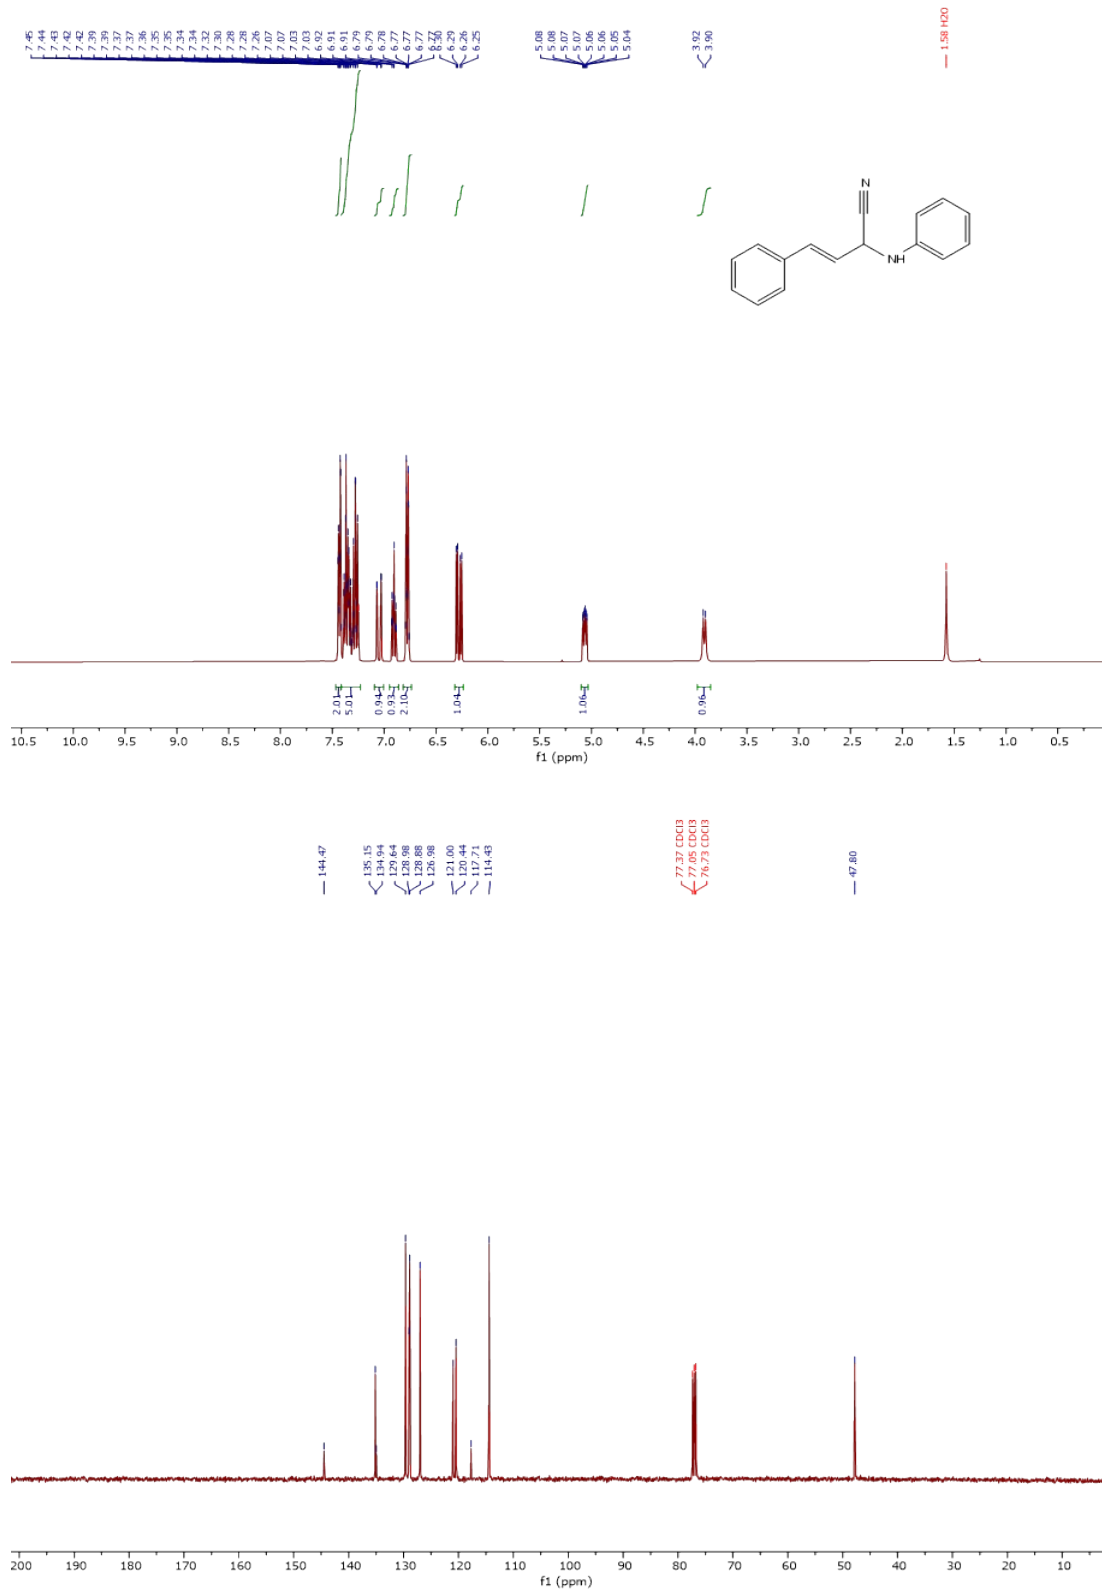

Fig. S13. <sup>1</sup>H and <sup>13</sup>C NMR of 4-phenyl-2-(phenylamino) but-3-enitrile.

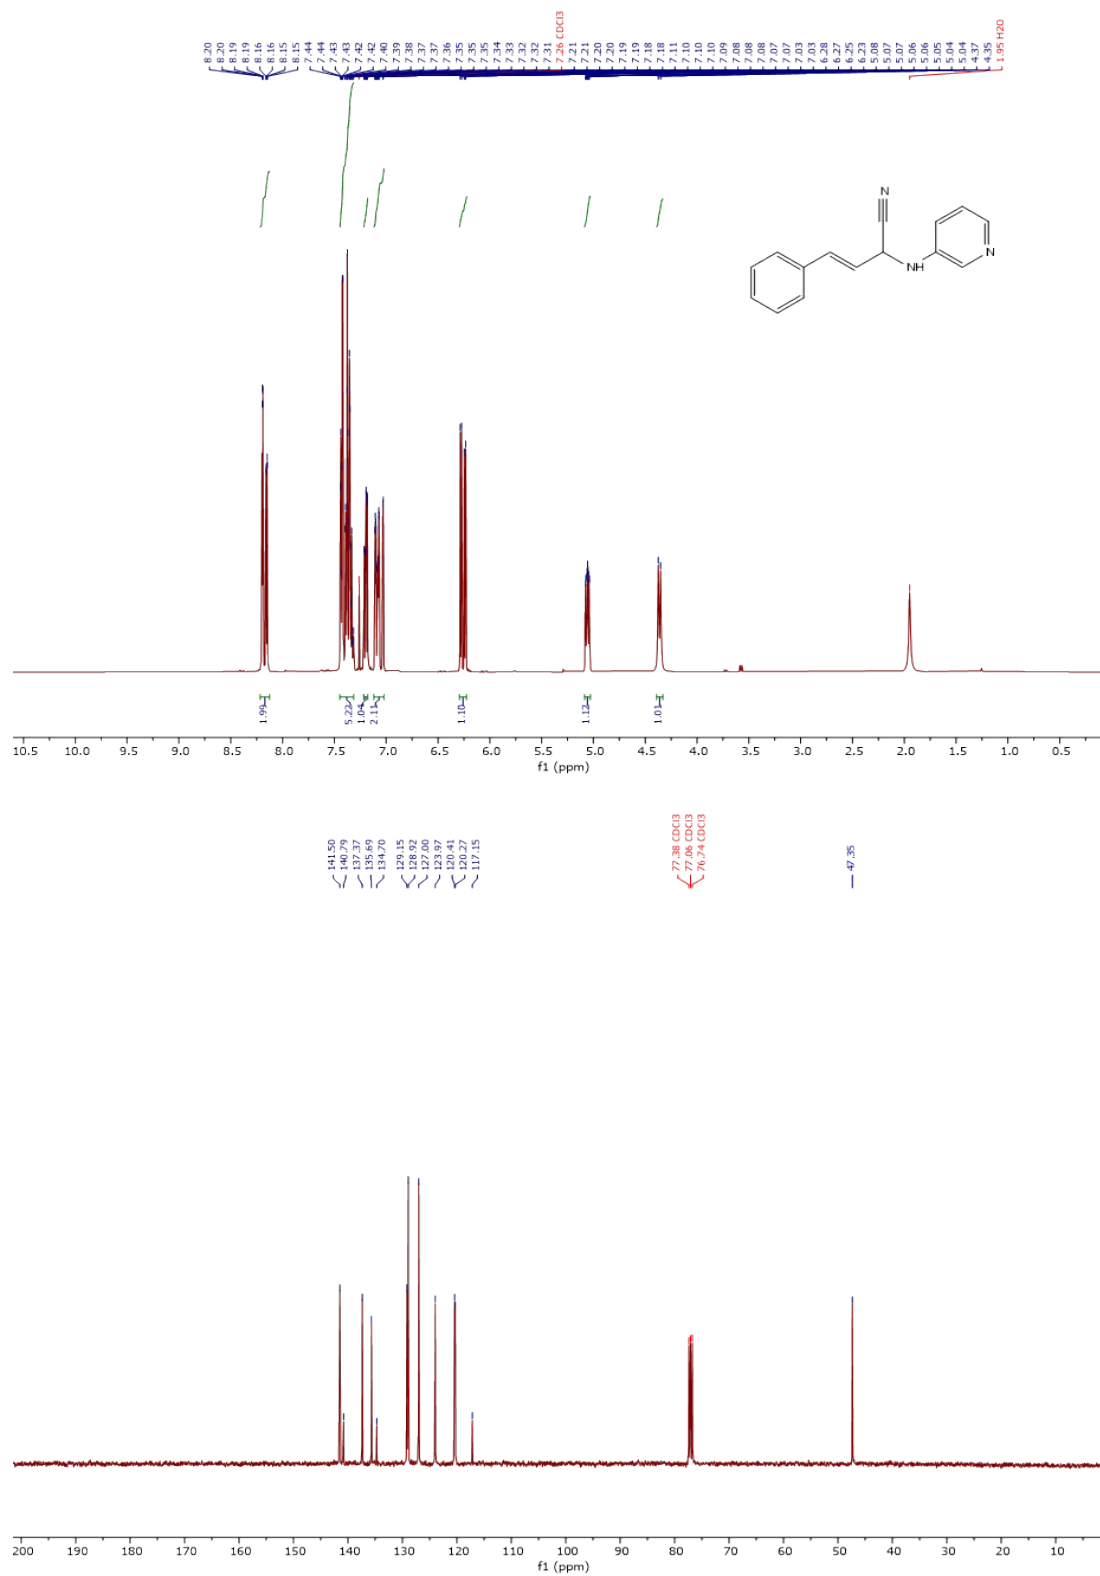

**Fig. S14.** <sup>1</sup>H and <sup>13</sup>C NMR of 4-phenyl-2-(pyridin-3-ylamino) but-3-enitrile.

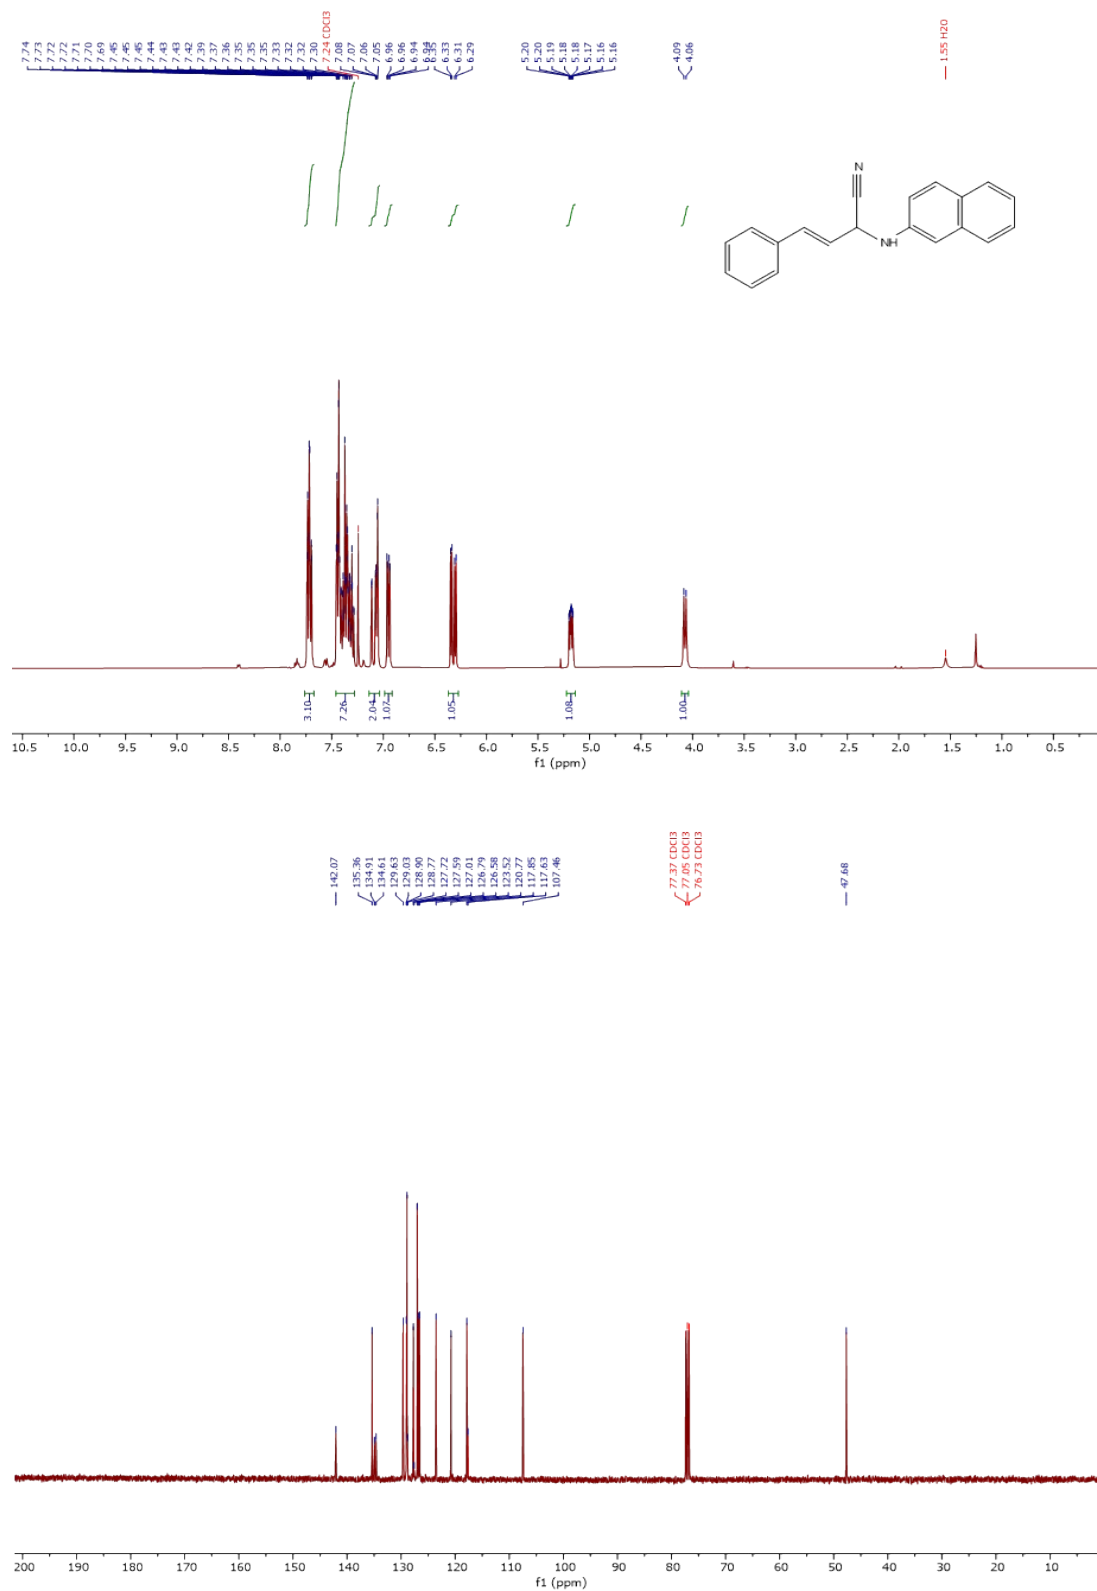

**Fig. S15.** <sup>1</sup>H and <sup>13</sup>C NMR of 2-(naphthalen-2-ylamino)-4-phenylbut-3-enitrile.

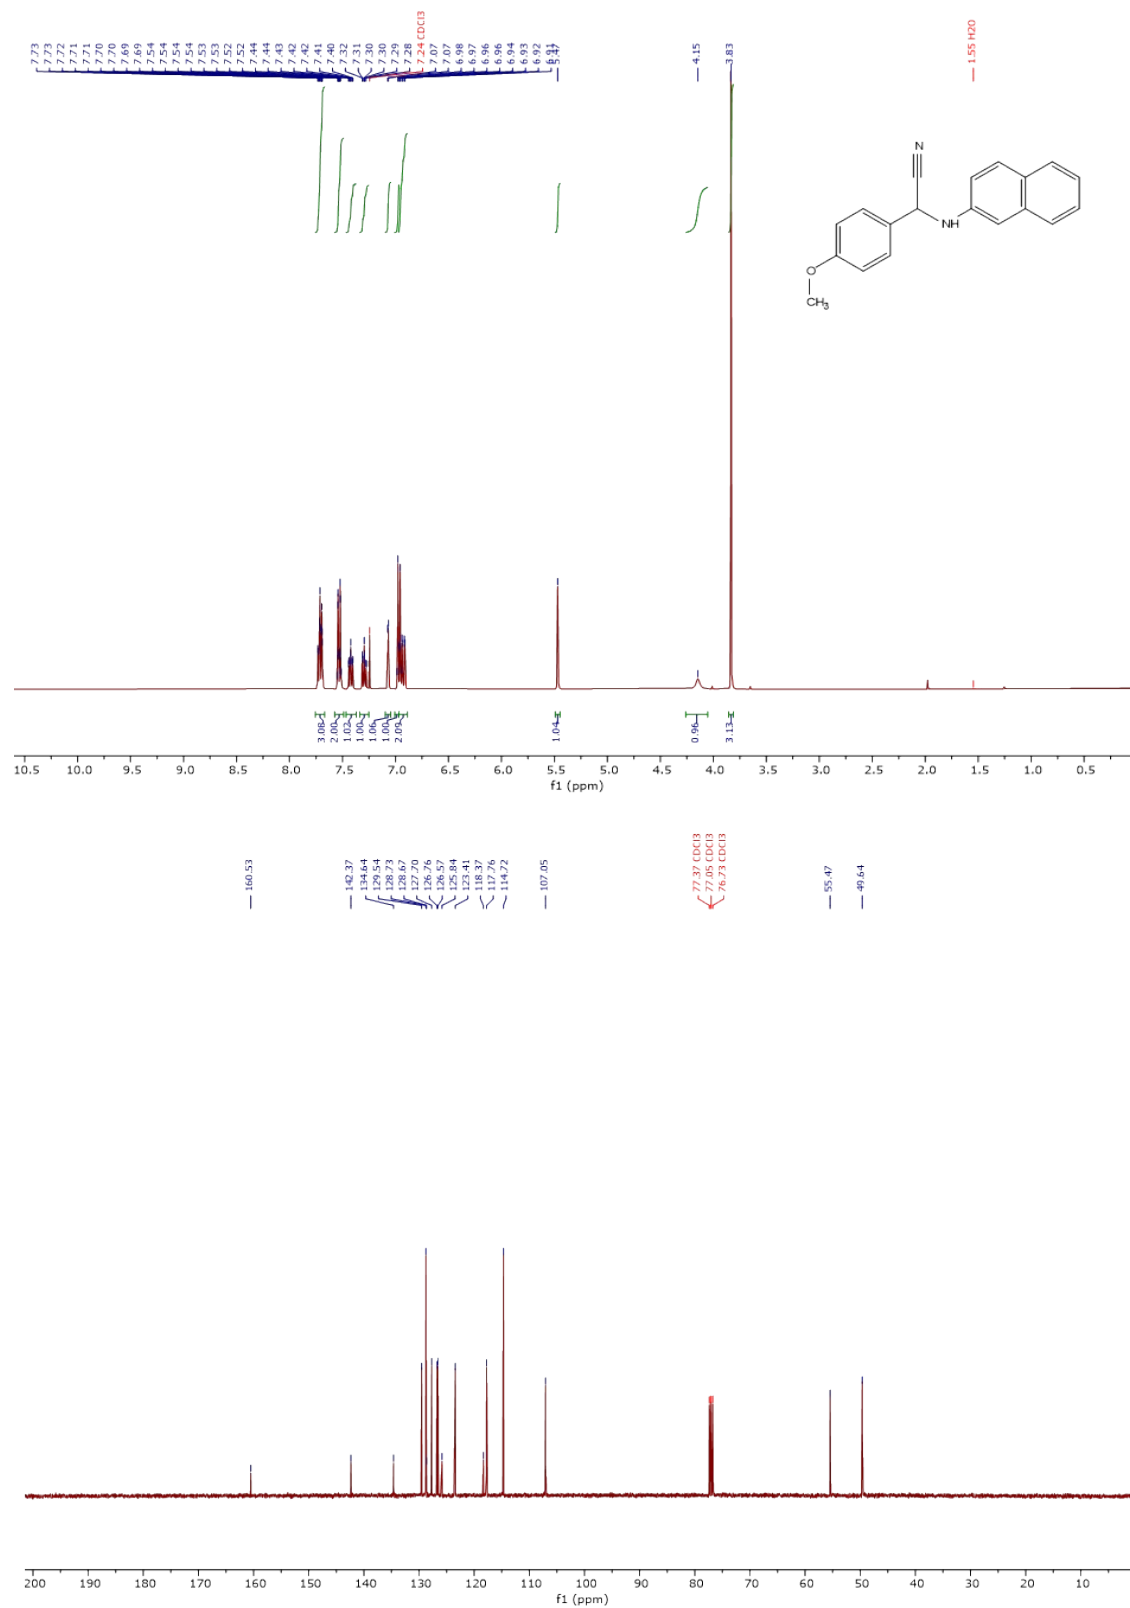

**Fig. S16.** <sup>1</sup>H and <sup>13</sup>C NMR of 2-(4-methoxyphenyl)-2-(naphthalen-2-ylamino) acetonitrile.

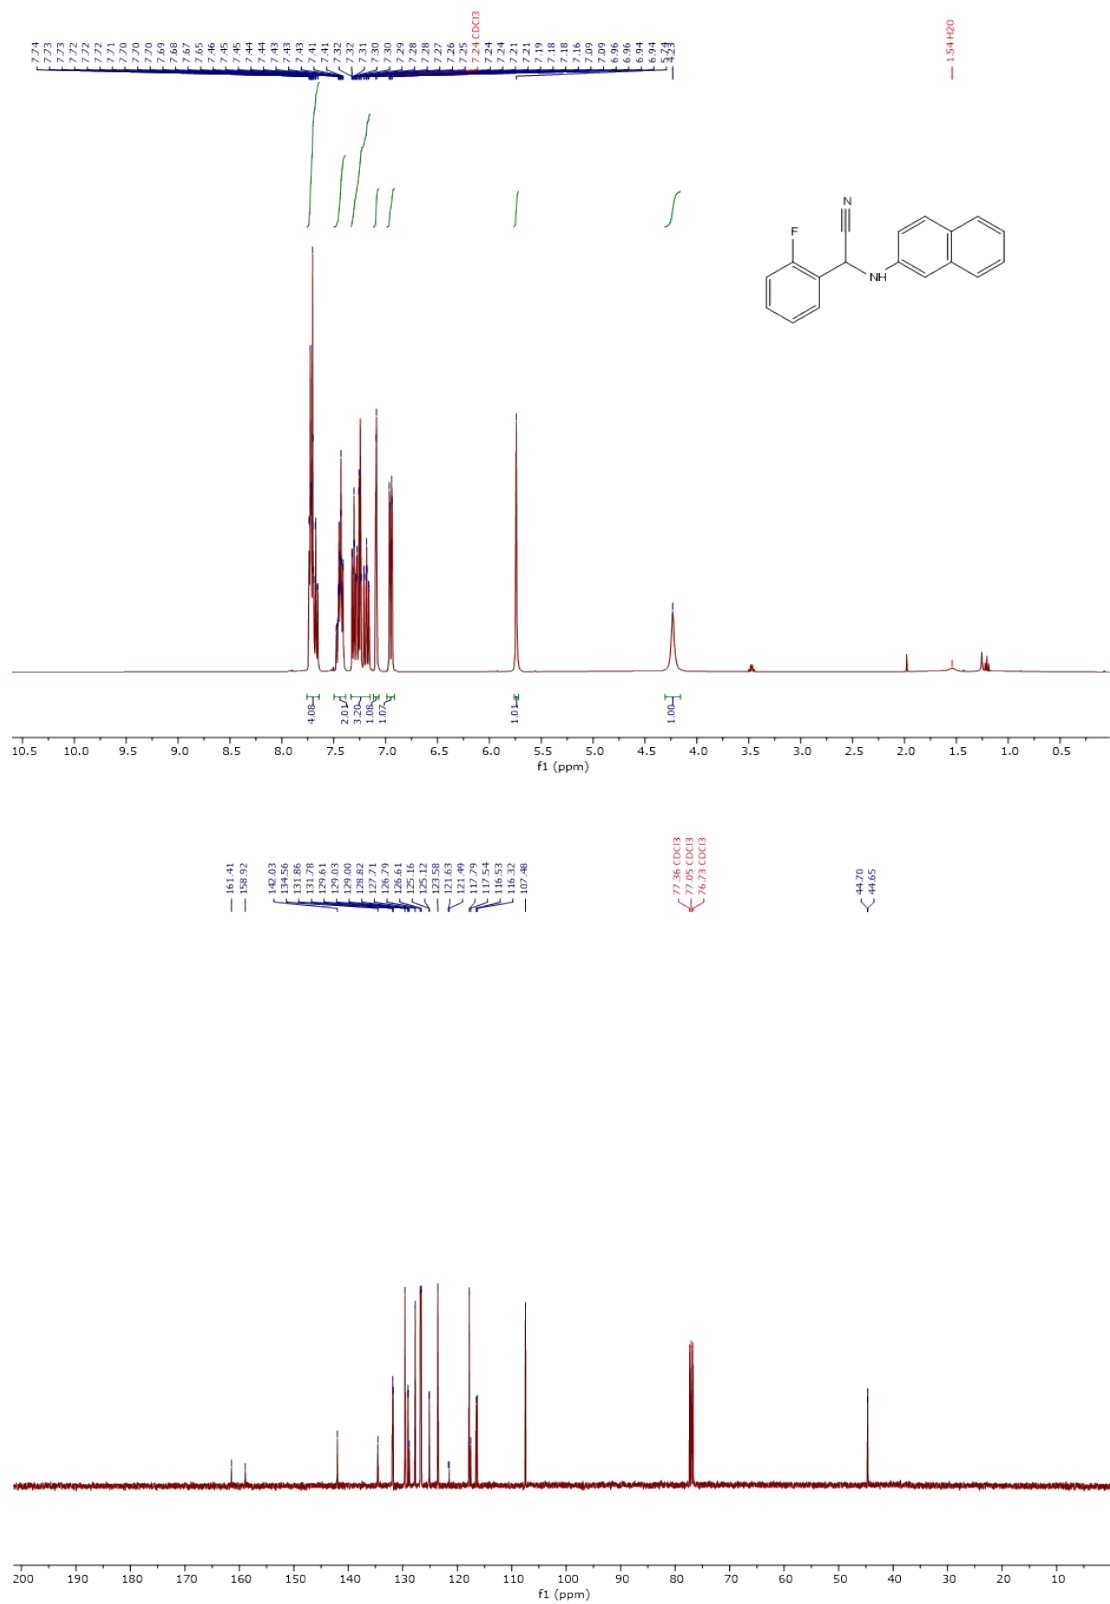

**Fig. S17.** <sup>1</sup>H and <sup>13</sup>C NMR of 2-(2-fluorophenyl)-2-(naphthalen-2-ylamino) acetonitrile.





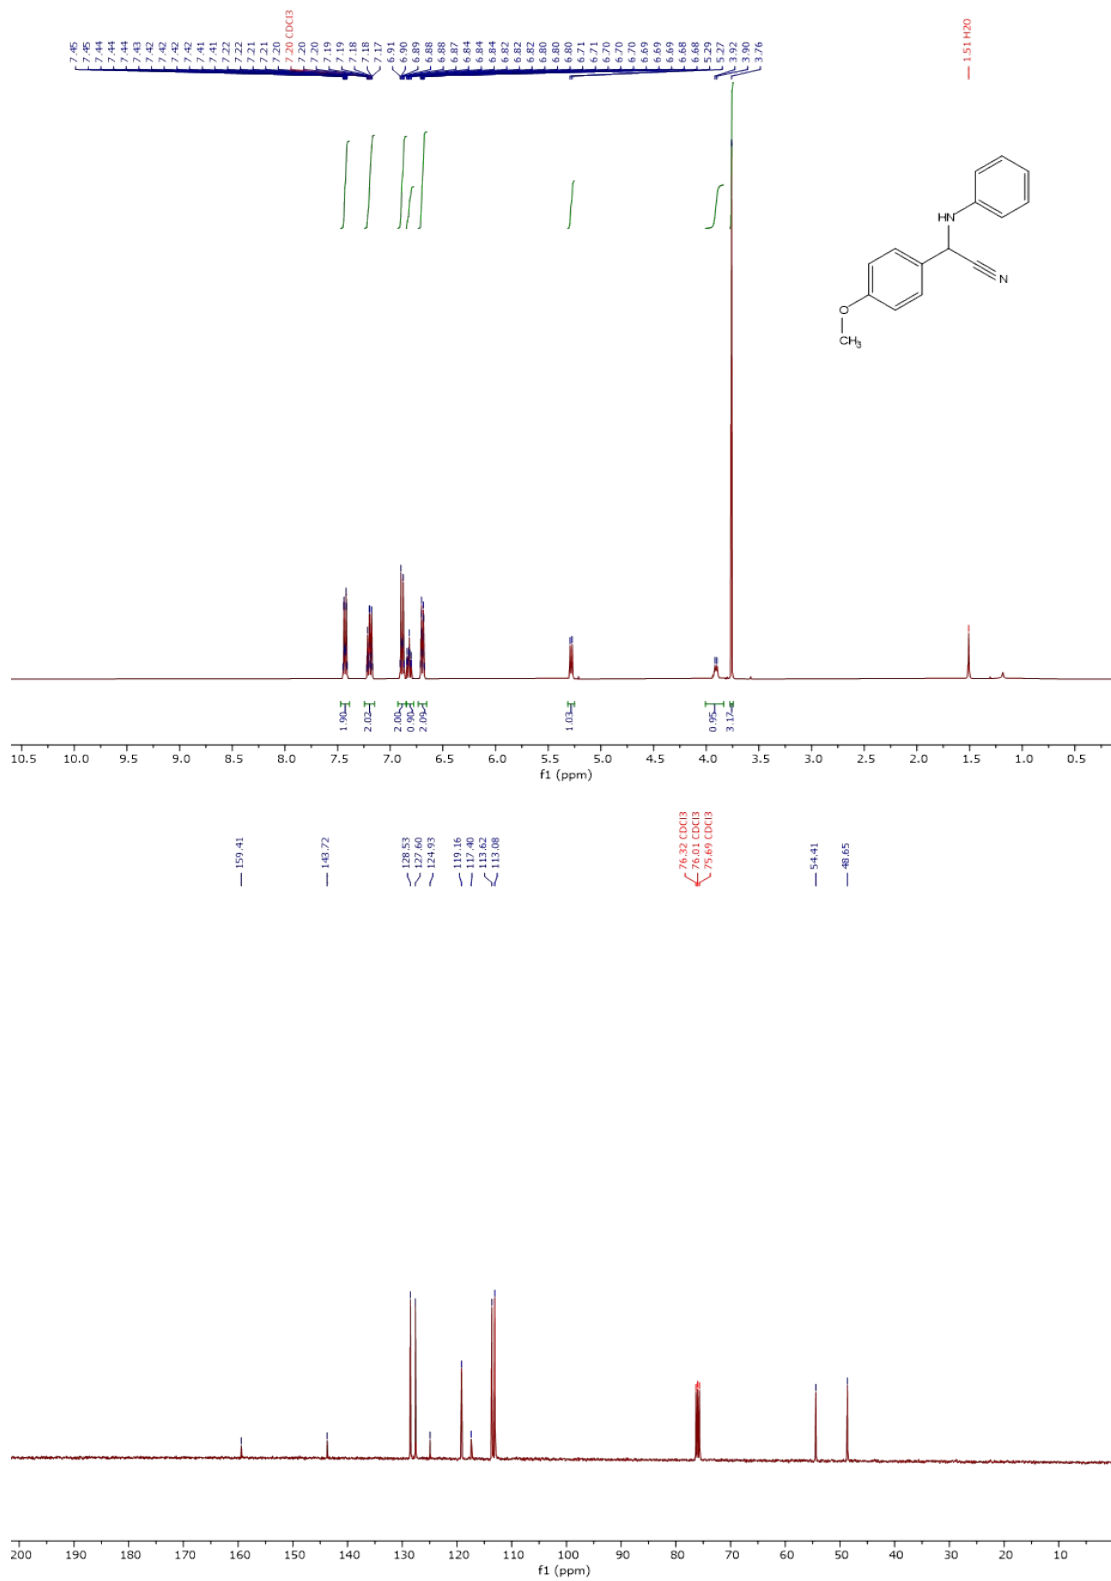

**Fig. S19.** <sup>1</sup>H and <sup>13</sup>C NMR of 2-(4-methoxyphenyl)-2-(phenylamino) acetonitrile.

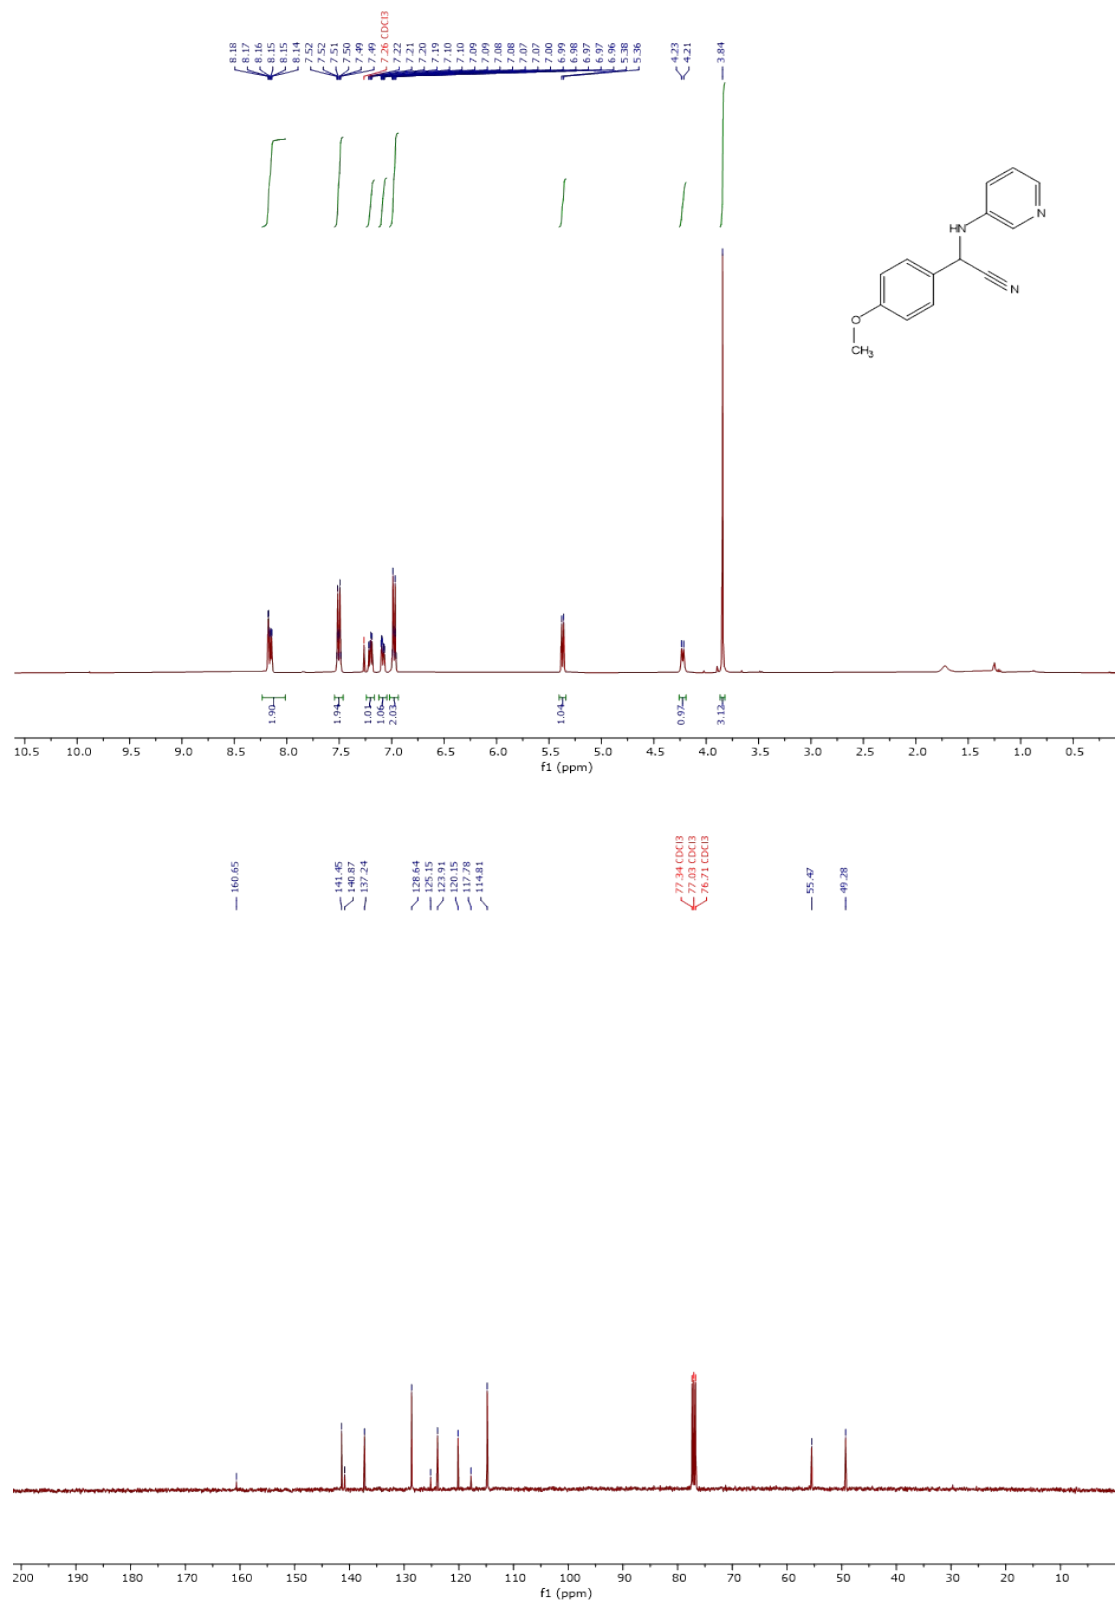

**Fig. S20.** <sup>1</sup>H and <sup>13</sup>C NMR of 2-(4-methoxyphenyl)-2-(pyridine-3-ylamino) acetonitrile.

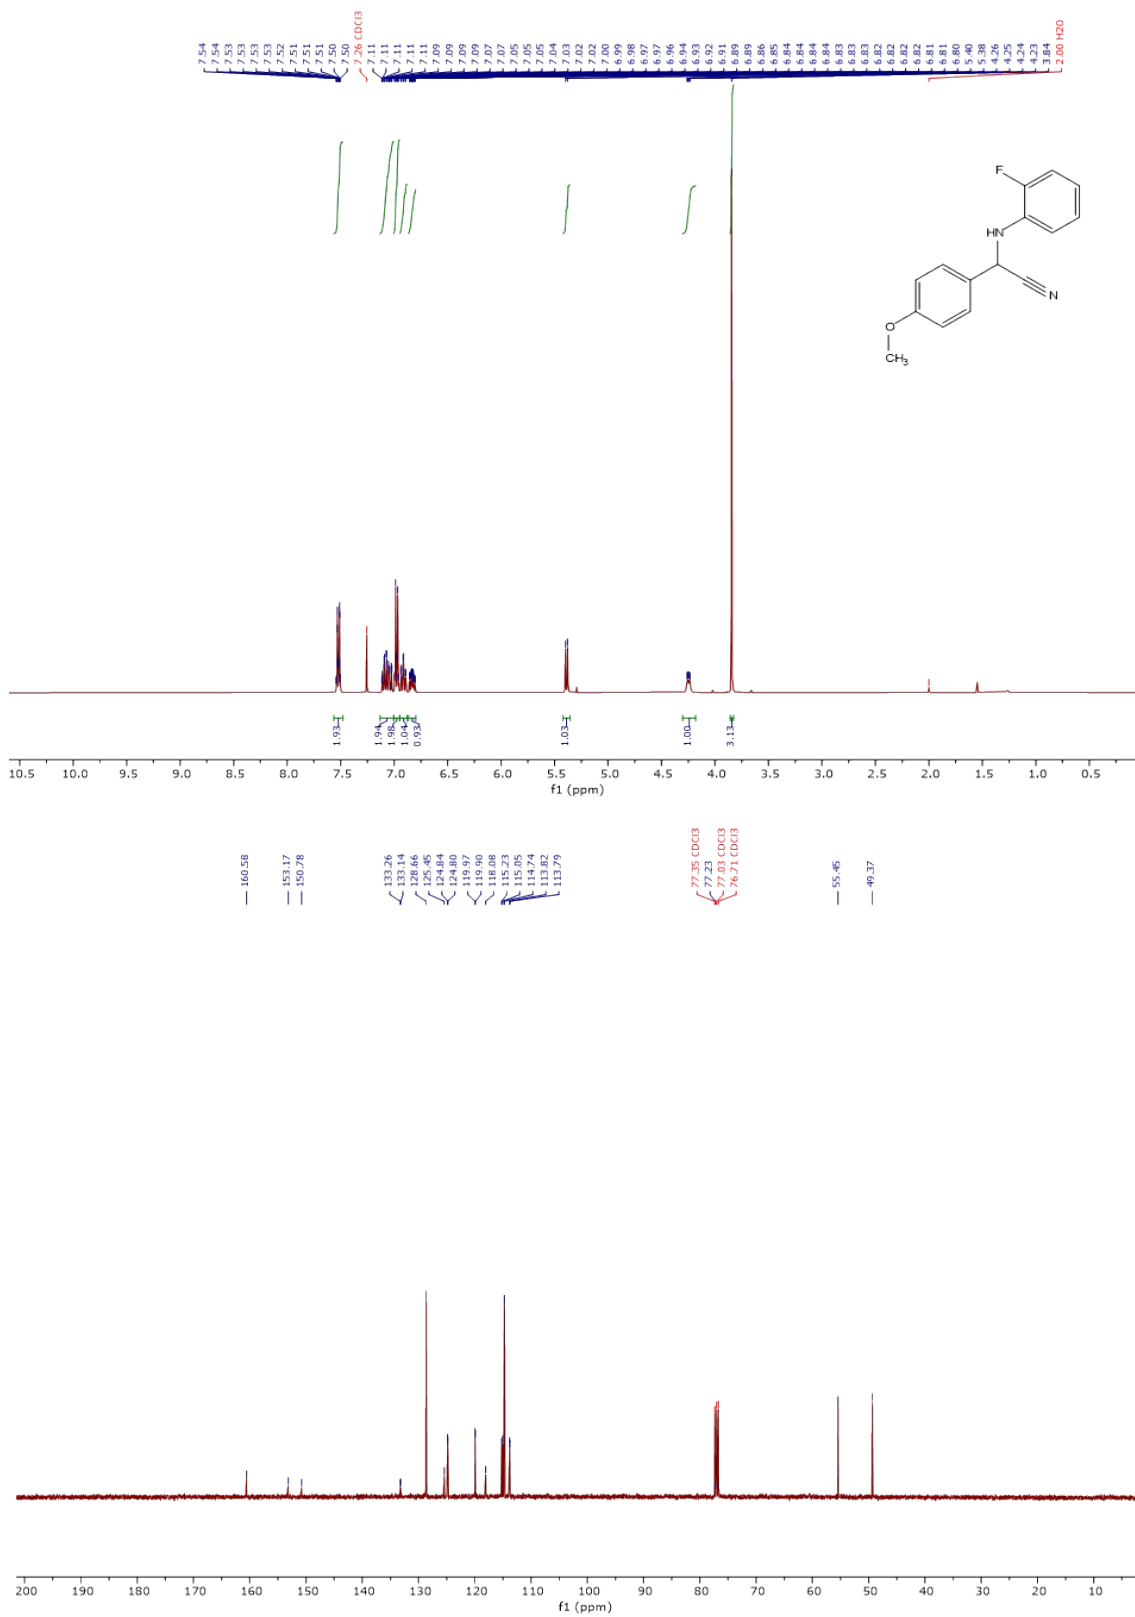

**Fig. S21.** <sup>1</sup>H and <sup>13</sup>C NMR of 2-((2-fluorophenyl)amino)-2-(4-methoxyphenyl) acetonitrile.

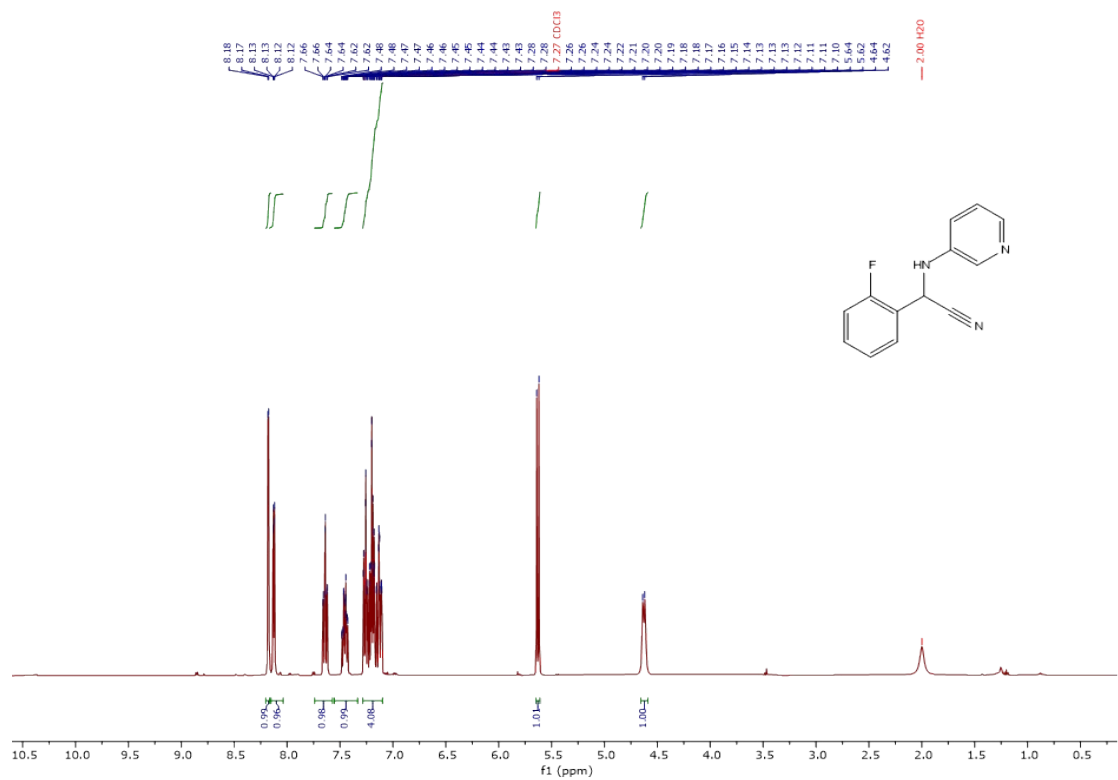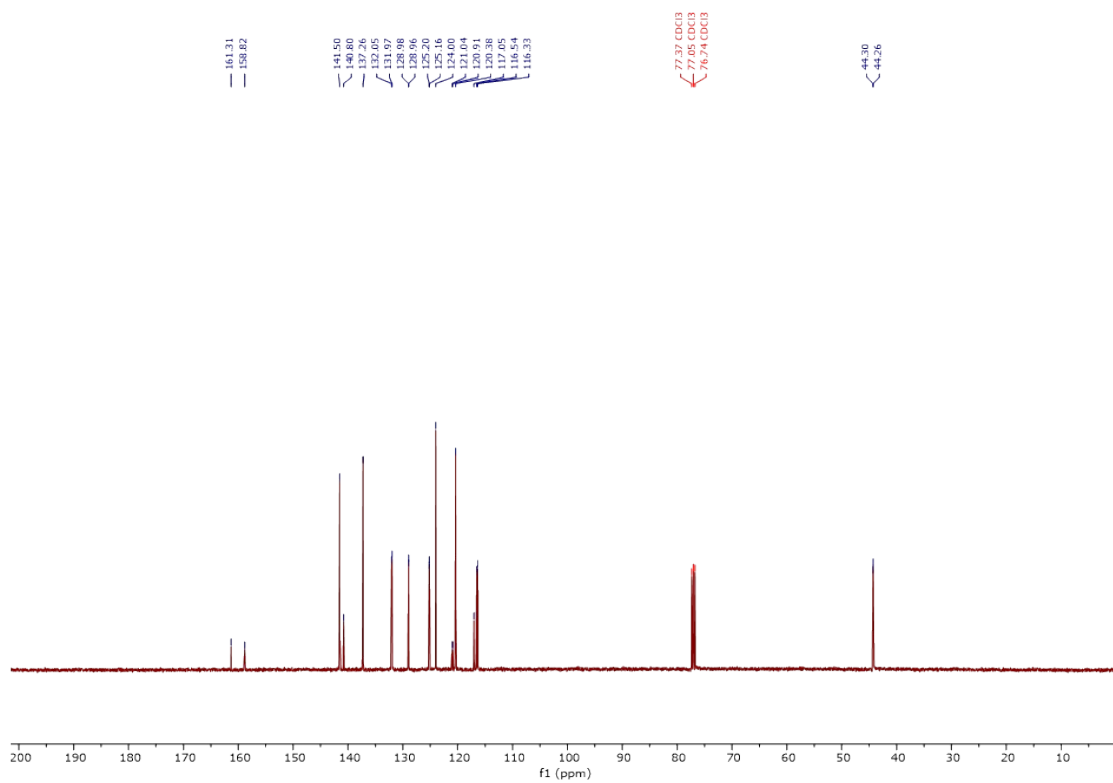

Fig. S22. <sup>1</sup>H and <sup>13</sup>C NMR of 2-(2-fluorophenyl)-2-(pyridine-4-ylamino) acetonitrile.

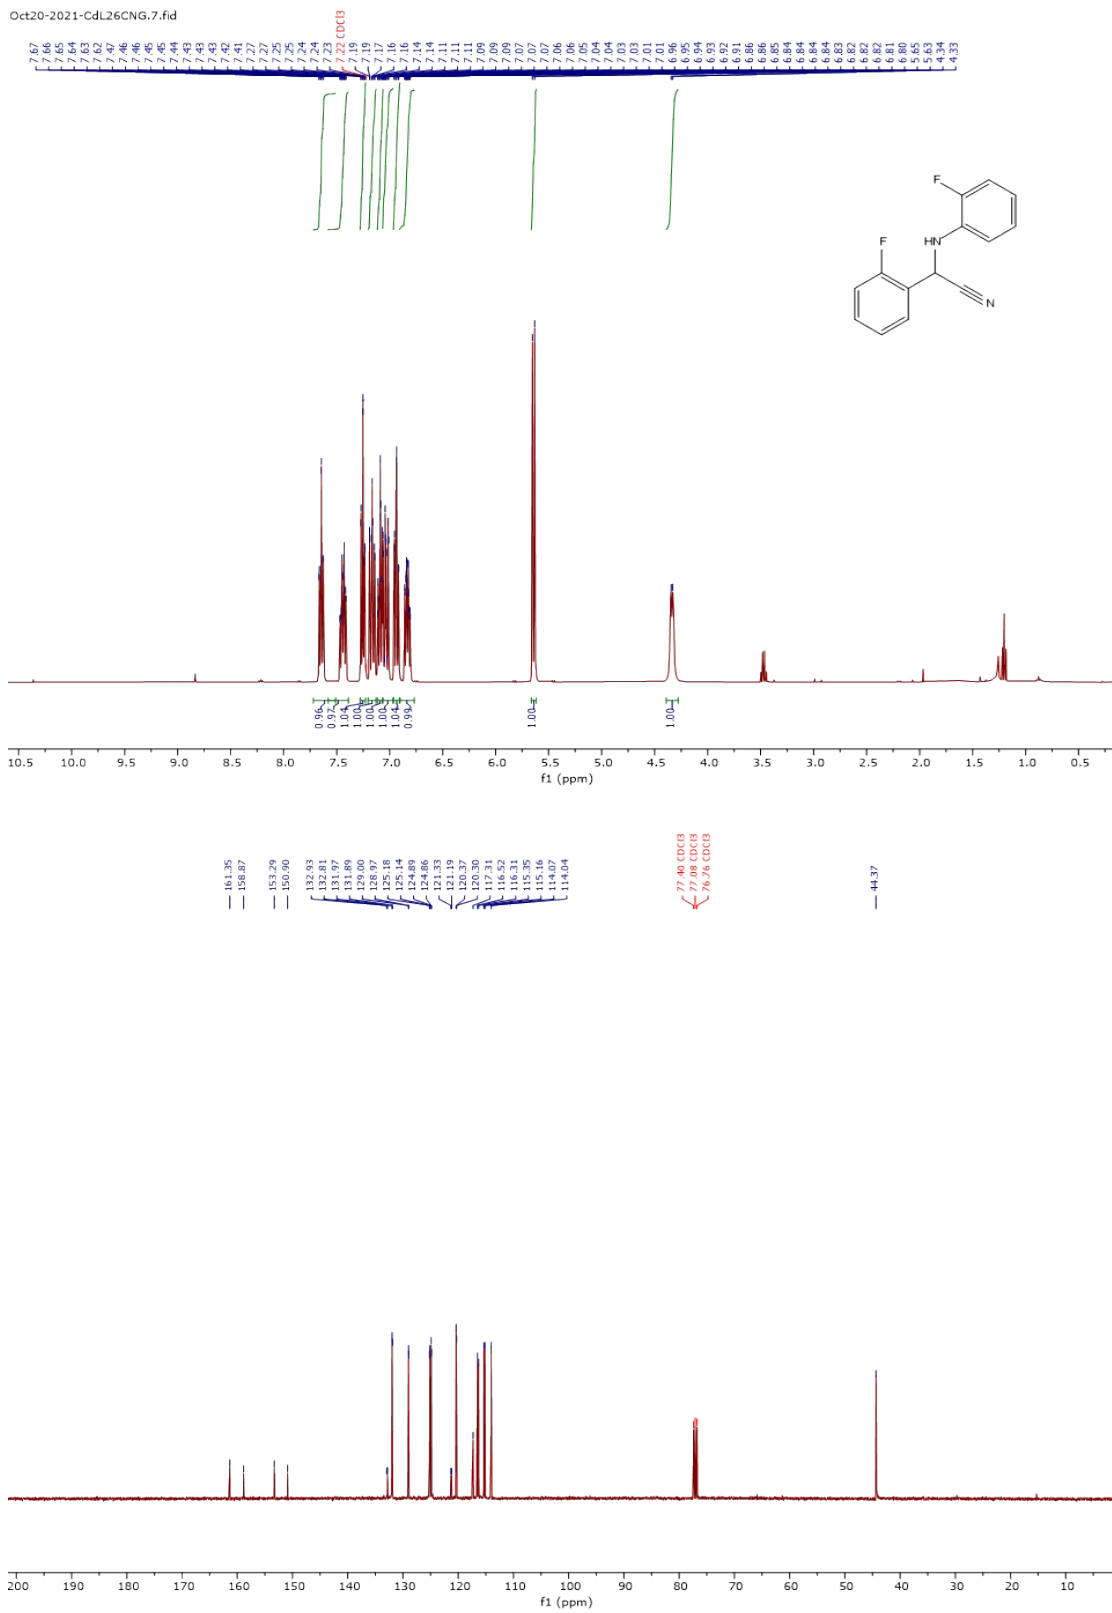

**Fig. S23.** <sup>1</sup>H and <sup>13</sup>C NMR of 2-(2-fluorophenyl)-2-((2-fluorophenyl)amino)acetonitrile.

**Table S3.** Comparison of **1** and **2** as catalysts with some other reported catalysts for the imines

Reaction scheme: c1ccc(cc1)C=C(Nc2ccccc2) + Me3SiCN >> c1ccc(cc1)C(C#N)(Nc2ccccc2)

| Entry No. | Catalysts                                                                                                                 | Conditions and Yield (%) | References |
|-----------|---------------------------------------------------------------------------------------------------------------------------|--------------------------|------------|
| 1         | <b>1</b>                                                                                                                  | 4hrs, RT and 93          | This work  |
|           | <b>2</b>                                                                                                                  | 4hrs, RT and 95          |            |
| 2         | (i) [Cu(L)(H <sub>2</sub> O)]·2H <sub>2</sub> O                                                                           | 4hrs, RT and 81          | S1         |
|           | (ii) [Zn(L)]                                                                                                              | 4hrs, RT and 80          |            |
|           | (iii) [Ag(HL)(CH <sub>3</sub> CN)]                                                                                        | 4hrs, RT and 72          |            |
|           | (i) [Cu(L)(H <sub>2</sub> O)]·2H <sub>2</sub> O                                                                           | 5hrs, RT and 97          |            |
|           | (ii) [Zn(L)]                                                                                                              | 5hrs, RT and 98          |            |
|           | (iii) [Ag(HL)(CH <sub>3</sub> CN)]                                                                                        | 5hrs, RT and 92          |            |
| 3         | (i) [Cd(L)(H <sub>2</sub> O)]·H <sub>2</sub> O                                                                            | 4hrs, RT and 81          | S2         |
|           | (ii) [Cd(L)]                                                                                                              | 4hrs, RT and 70          |            |
| 4         | (i) [Cu <sub>2</sub> (μ <sub>3</sub> -OH)(H <sub>2</sub> O){NIPA}-(CN <sub>4</sub> H)]·(H <sub>2</sub> O)                 | 6hrs, RT and 95          | S3         |
|           | (ii) [Cu <sub>2</sub> (μ <sub>3</sub> -OH)(H <sub>2</sub> O){NIPA}-(CN <sub>5</sub> -H <sub>2</sub> )]·(H <sub>2</sub> O) | 6hrs, RT and 53          |            |
| 5         | {[In <sub>3</sub> (NIPA) <sub>3</sub> (HNIPA)(OH) <sub>2</sub> ]·4H <sub>2</sub> O} <sub>n</sub>                          | 24hrs, RT and 96         | S4         |

cyanosilylation reaction.

H<sub>2</sub>L = 5-(3,5-dimethyl-1H-pyrazol-1-yl) 1,3-benzenedicarboxylic acid; H<sub>2</sub>NIPA = 5-nitroisophthalic acid; CN<sub>4</sub>H = tetrazole; CN<sub>5</sub>-H<sub>2</sub> = aminotetrazole.

#### Reference

S1. N. Kumar, T. Rom, V. Singh and A. K. Paul, *Cryst. Growth. Des.*, 2020, **20**, 5277-5288.

S2. N. Kumar and A. K. Paul, *Inorg. Chem.*, 2020, **59**, 1284-1294.

S3. D. Sarma, K. V. Ramanujachary, N. Stock and S. Natarajan, *Cryst. Growth. Des.*, 2011, **11**, 1357-1369.

S4. J. Chai, P. Zhang, J. Xu, H. Qi, J. Sun, S. Jing, X. Chen, Y. Fan and L. Wang, *Inorg. Chim. Acta.*, 2018, **479**, 165-171.
